# Supplementary material
Source: MDPI journal article supplement (https://www.mdpi.com/2076-3417/10/3/832)
Supplement: s1 [file s1]

## **CONTENTS**

*S3.1. Forests of subgroup analyses on the correlation between baseline BTMs and BMD changes*

*S3.2 Forests of subgroup analyses on the correlation between the changes in bone ALP and BMD*

*S3.3 Forests of subgroup analyses on the correlation between the changes in osteocalcin and BMD*

*S3.4 Forests of subgroup analyses on the correlation between the changes in PINP and BMD*

*S3.5 Forests of subgroup analyses on the correlation between the changes in S-CTX and BMD*

*S3.6 Forests of subgroup analyses on the correlation between the changes in U-NTX and BMD*

S3.1. Forests of subgroup analyses on the correlation between baseline BTMs and BMD changes

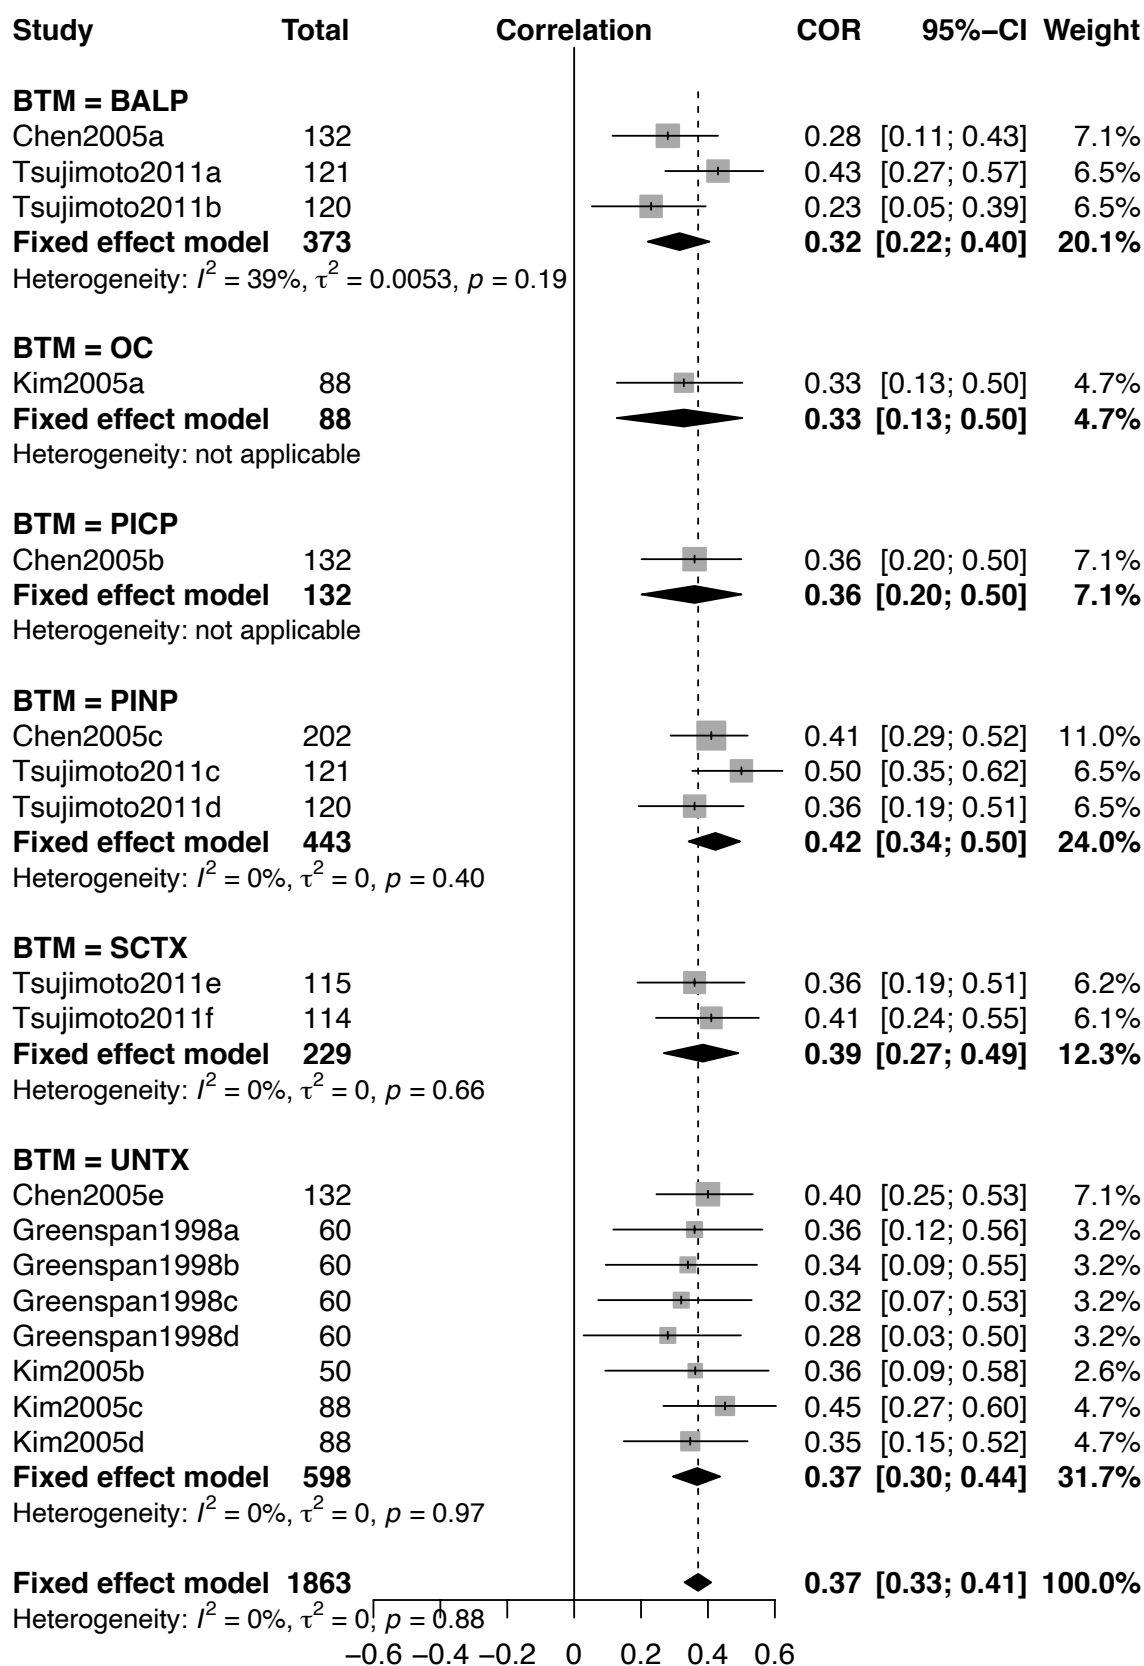

Figure S3.1.1 Forests of subgroup analyses on the correlation between baseline BTMs and BMD changes by group of BTMs.

### S3.2 Forests of subgroup analyses on the correlation between the changes in bone ALP and BMD

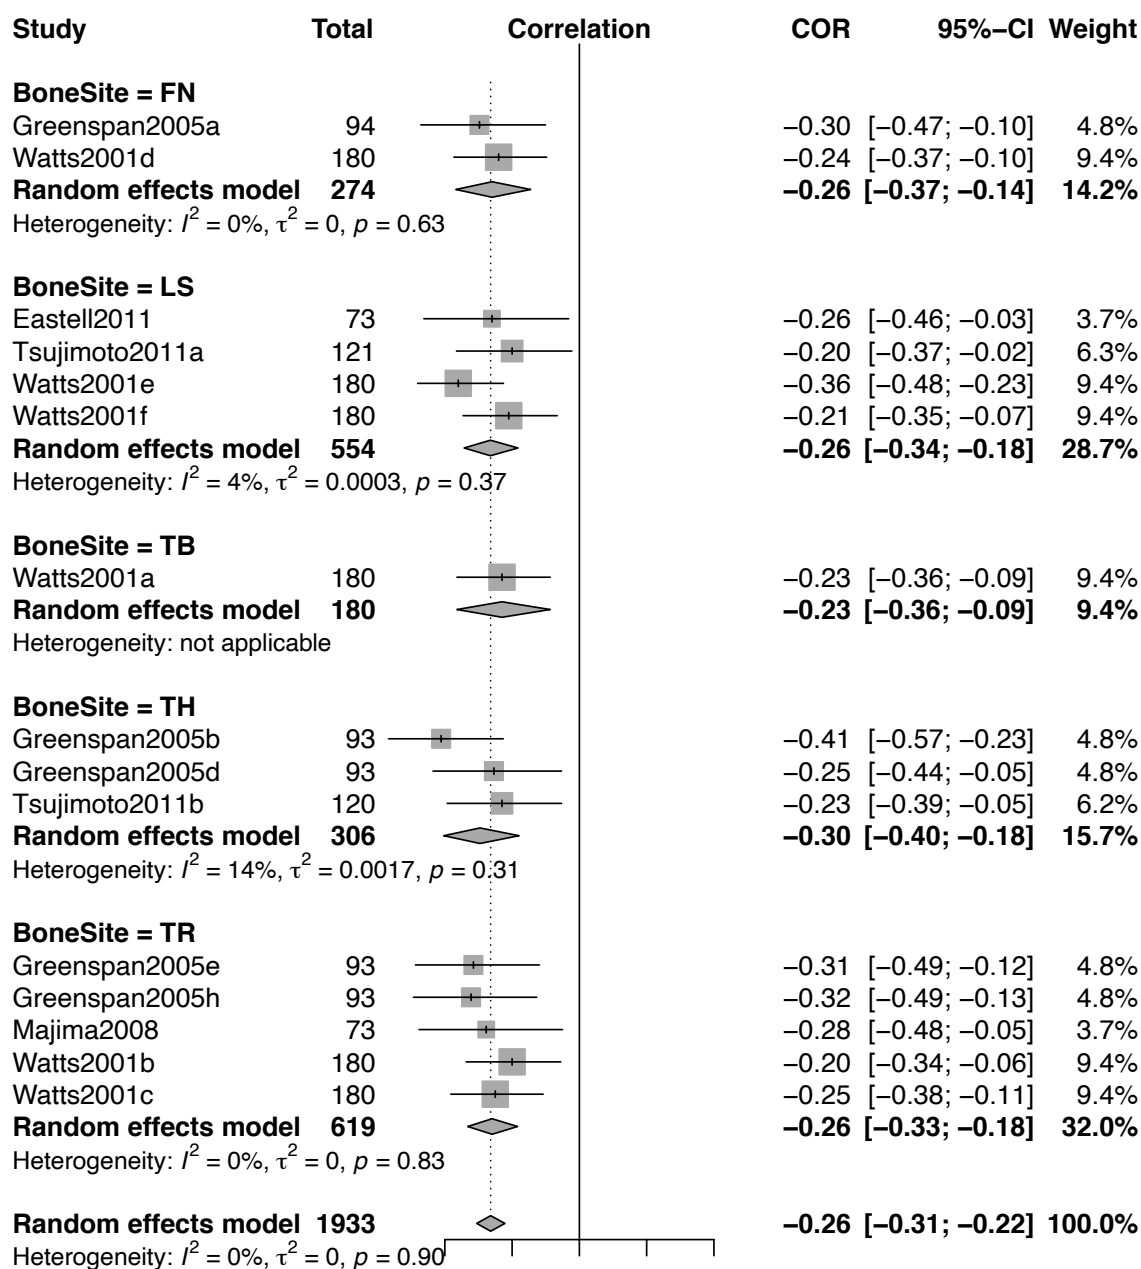

**Figure S3.2.1** Forests of subgroup analyses on the correlation between the changes in bone ALP and BMD by group of bone sites. FN femoral neck, LS lumbar spine, TB total body, TH total hip, TR trochanter.

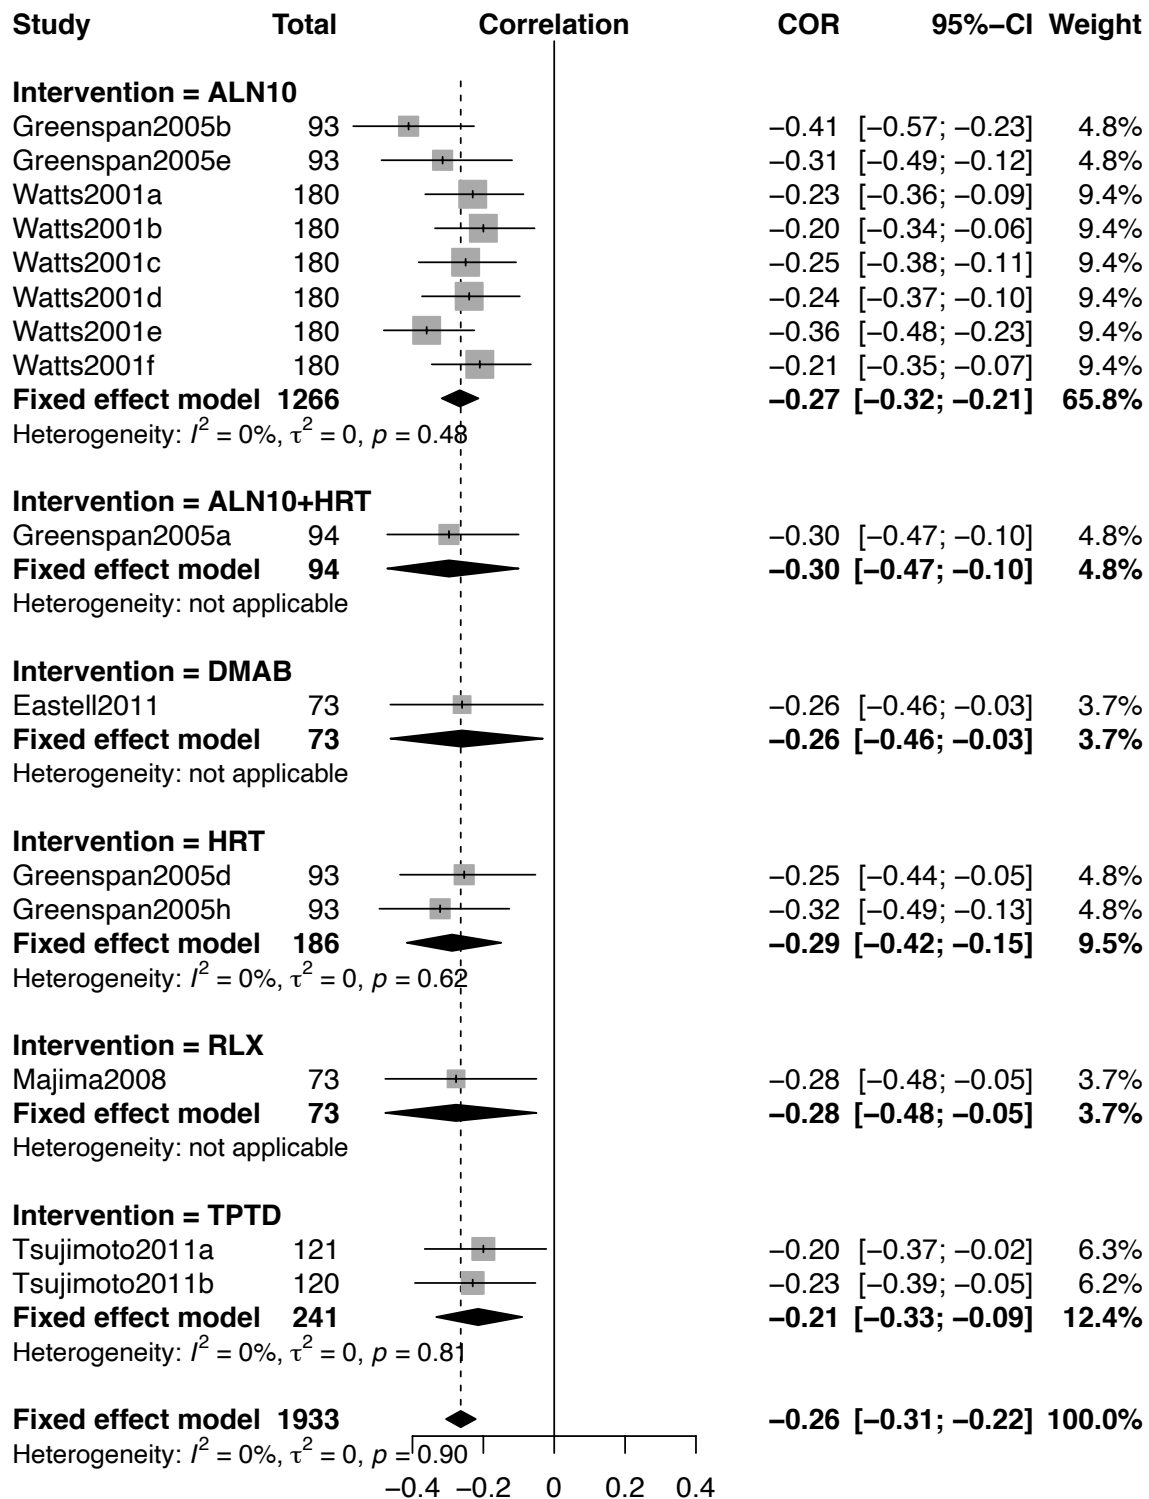

**Figure S3.2.2** Forests of subgroup analyses on the correlation between the changes in bone ALP and BMD by group of intervention. ALN10 10 mg/d Alendronate, ALN10+HRT combination of 10 mg/d Alendronate and HRT, HRT Hormone replacement therapy.

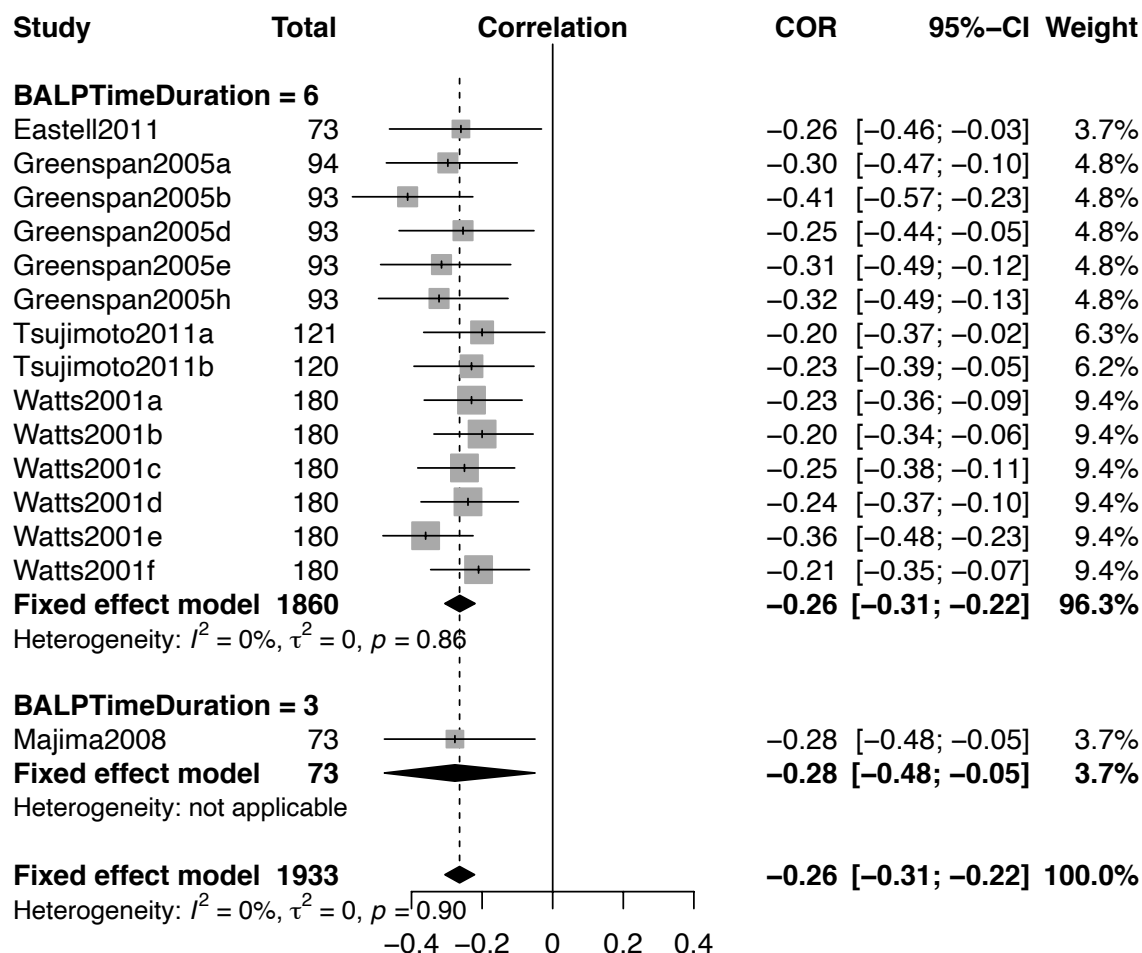

**Figure S3.2.3** Forests of subgroup analyses on the correlation between the changes in bone ALP and BMD by group of the time duration of bone ALP measurements.

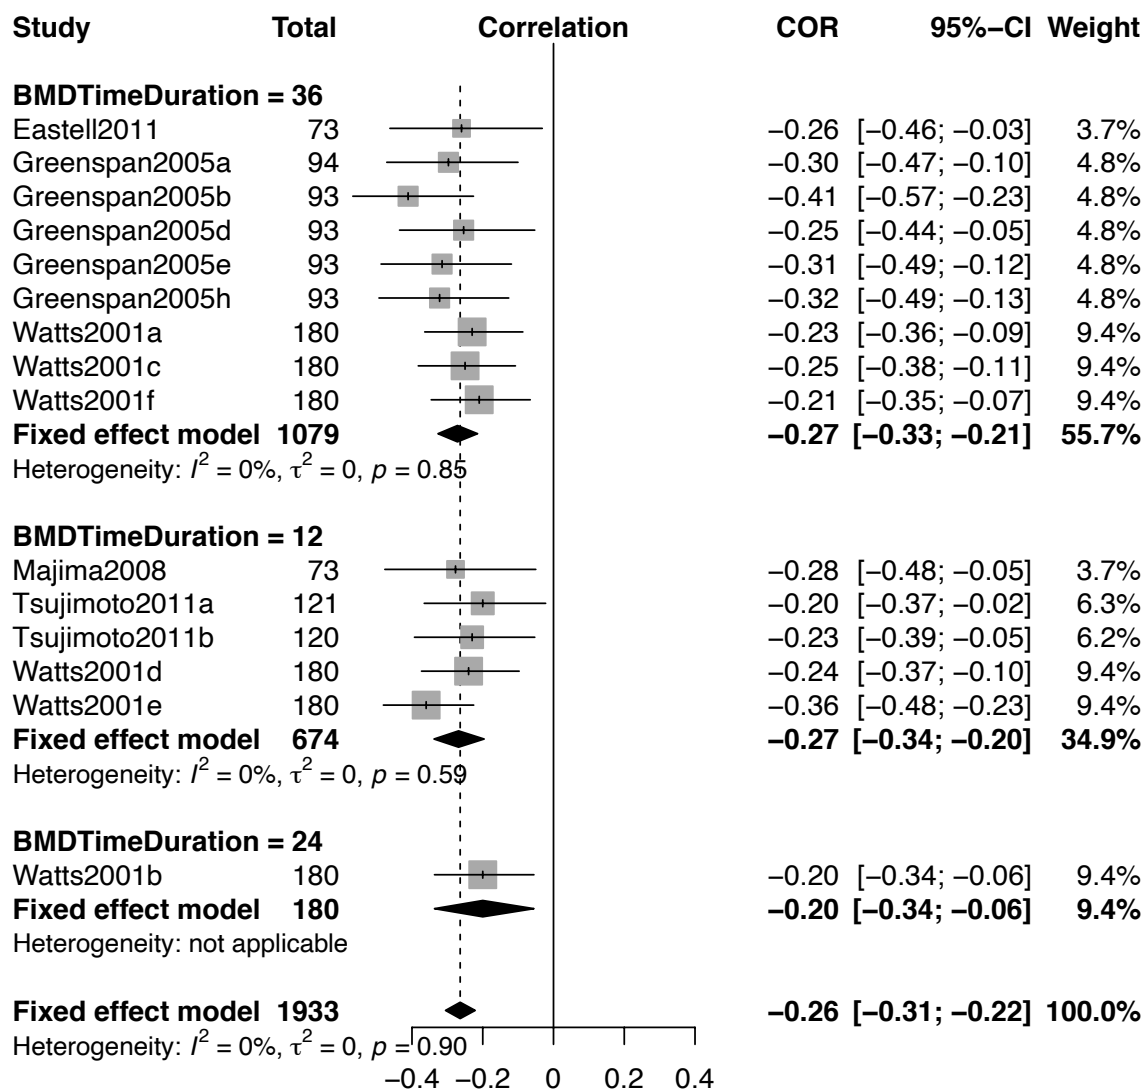

**Figure S3.2.4** Forests of subgroup analyses on the correlation between the changes in bone ALP and BMD by group of the time duration of BMD measurements.

### S3.3 Forests of subgroup analyses on the correlation between the changes in osteocalcin and BMD

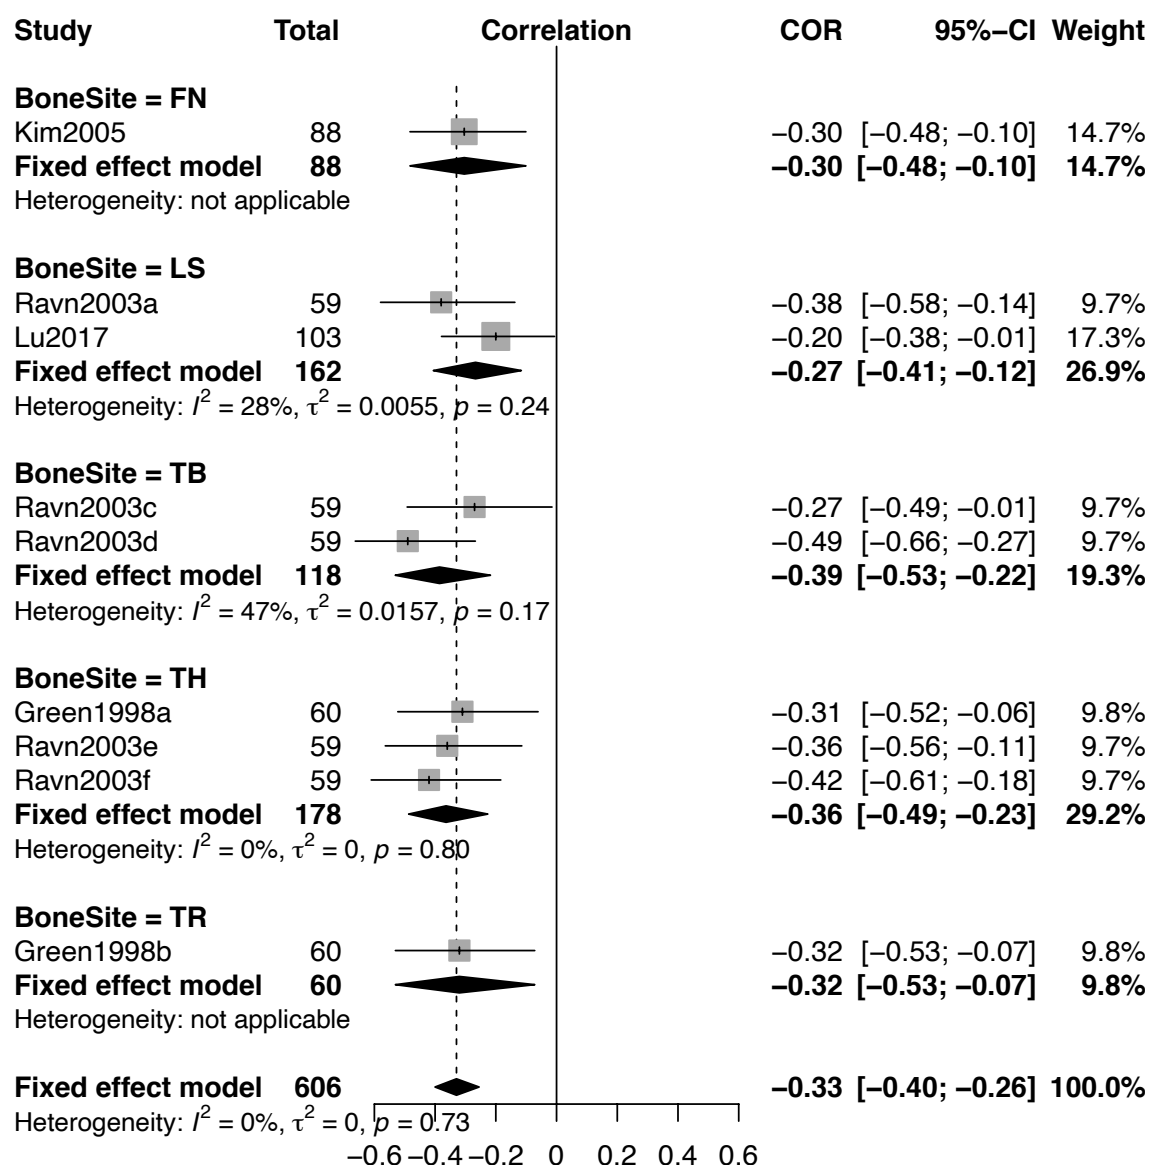

**Figure S3.3.1** Forests of subgroup analyses on the correlation between the changes in osteocalcin and BMD by group of bone sites. FN femoral neck, LS lumbar spine, TB total body, TH total hip, TR trochanter.

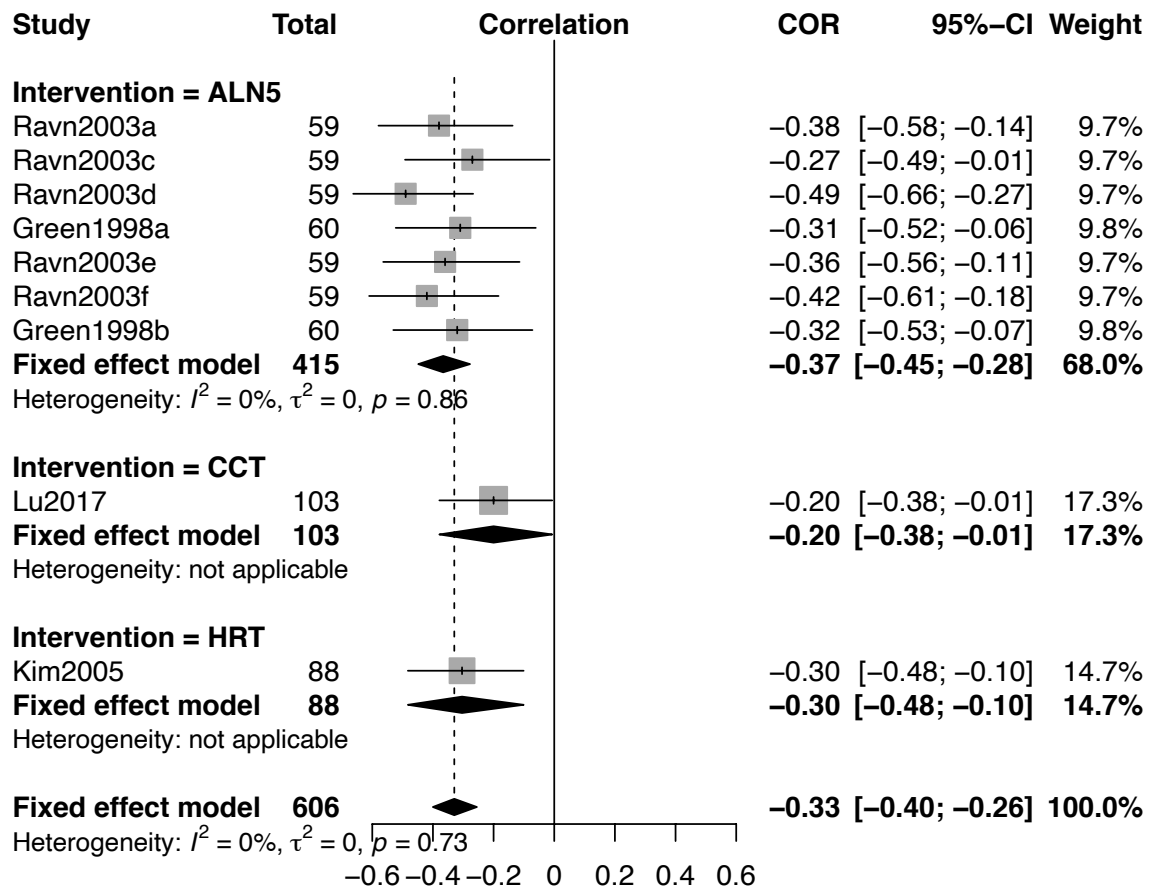

**Figure S3.3.2** Forests of subgroup analyses on the correlation between the changes in osteocalcin and BMD by group of intervention. ALN5 5 mg/d Alendronate, CCT Calcitonin, HRT Hormone replacement therapy.



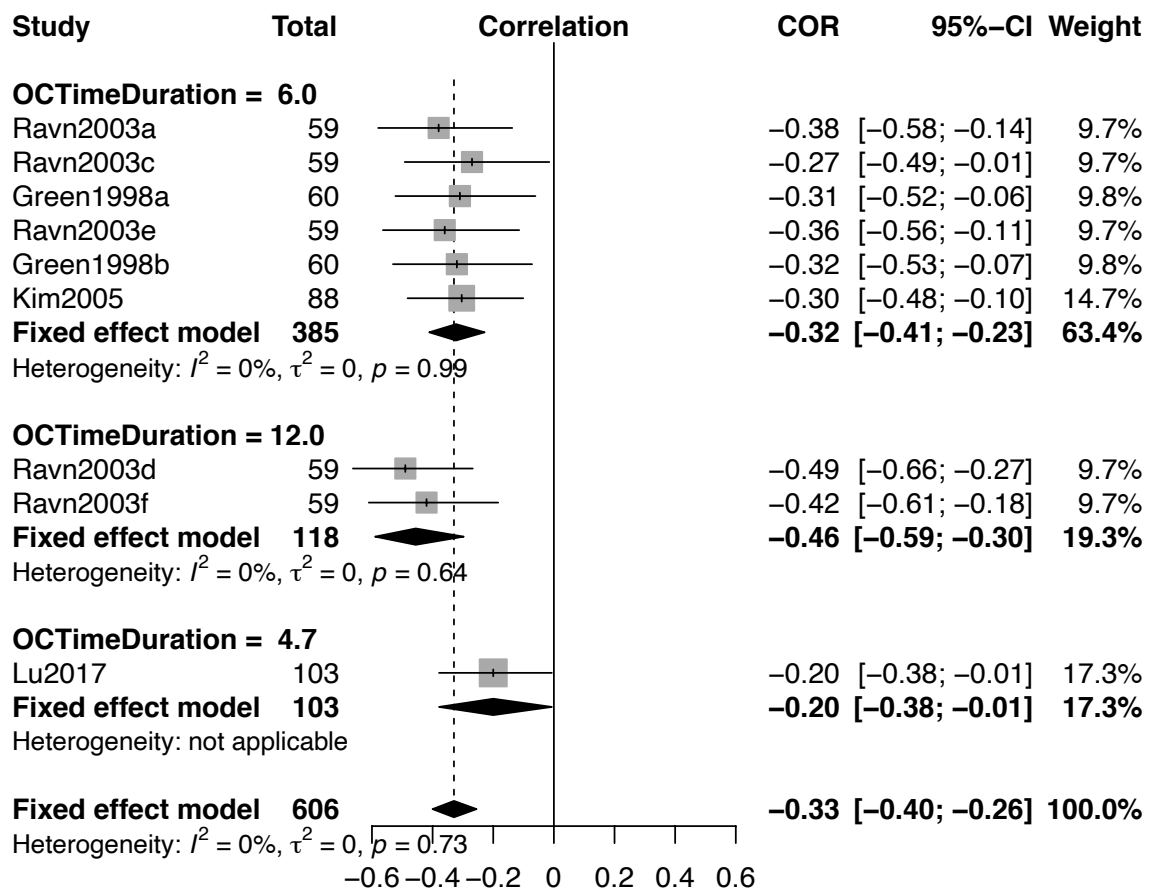

**Figure S3.3.3** Forests of subgroup analyses on the correlation between the changes in osteocalcin and BMD by group of the time duration of osteocalcin measurements.

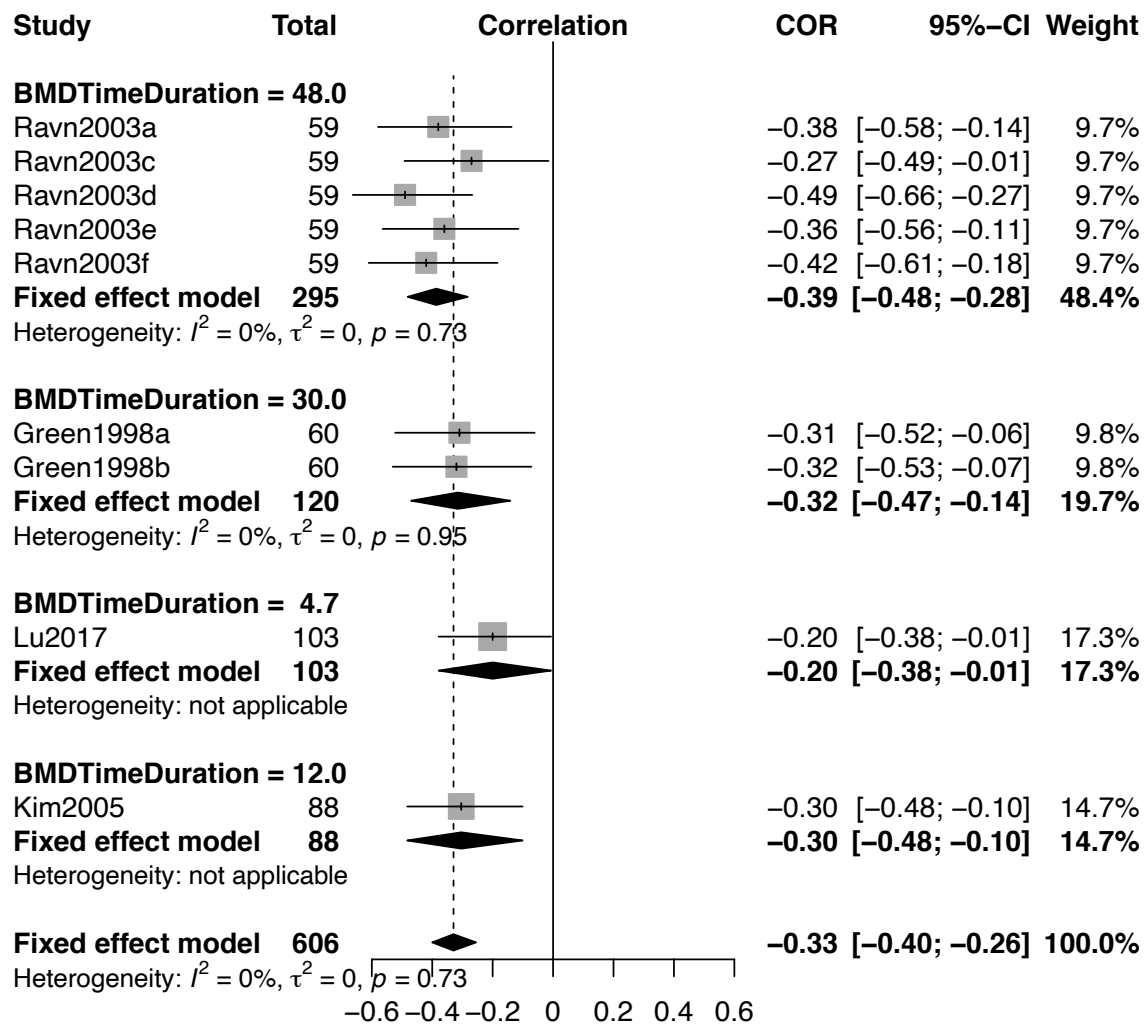

**Figure S3.3.4** Forests of subgroup analyses on the correlation between the changes in osteocalcin and BMD by group of the time duration of BMD measurements.

### S3.4 Forests of subgroup analyses on the correlation between the changes in PINP and BMD

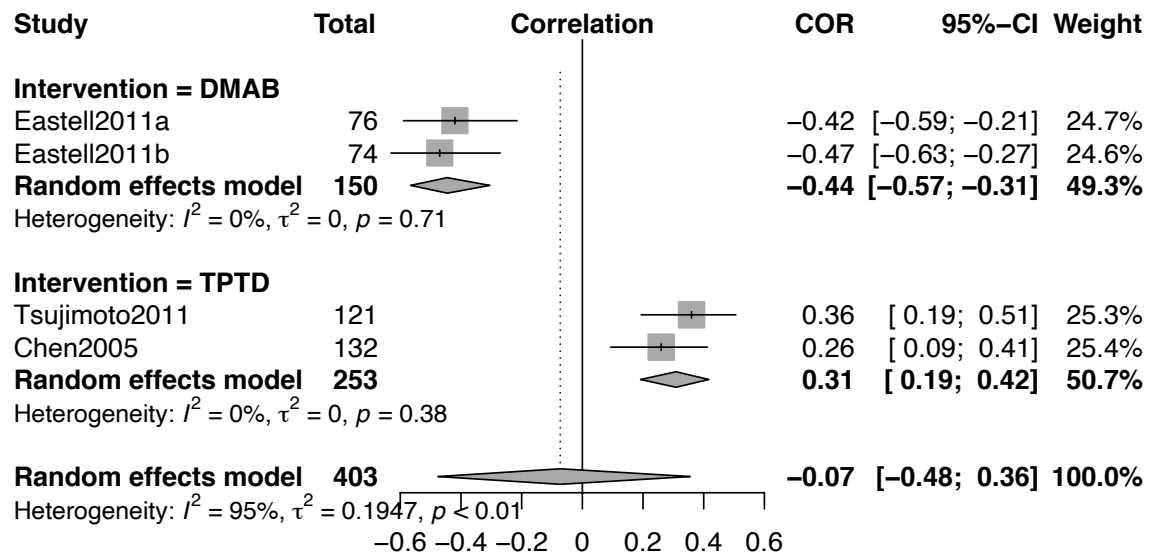

**Figure S3.4.1** Forests of subgroup analyses on the correlation between the changes in PINP and BMD by group of intervention. DMAB Denosumab, TPTD Teriparatide.

### S3.5 Forests of subgroup analyses on the correlation between the changes in S-CTX and BMD

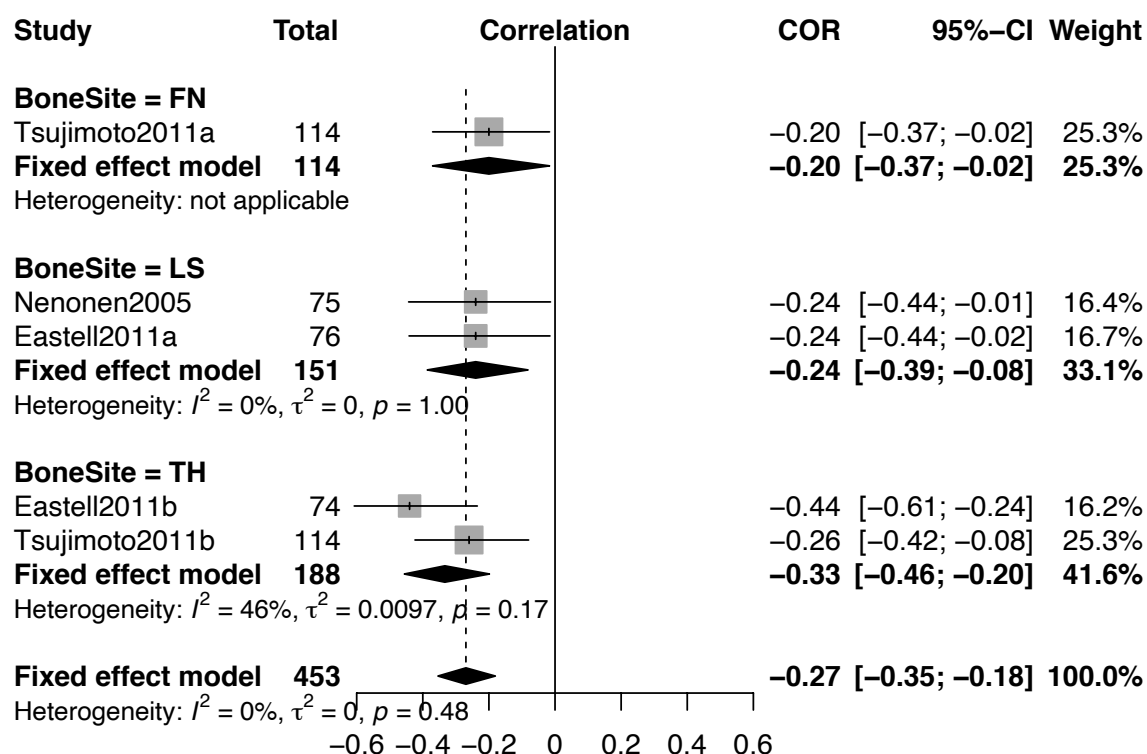

Figure S3.5.1 Forests of subgroup analyses on the correlation between the changes in S-CTX and BMD by group of bone sites. FN femoral neck, LS lumbar spine, TH total hip.

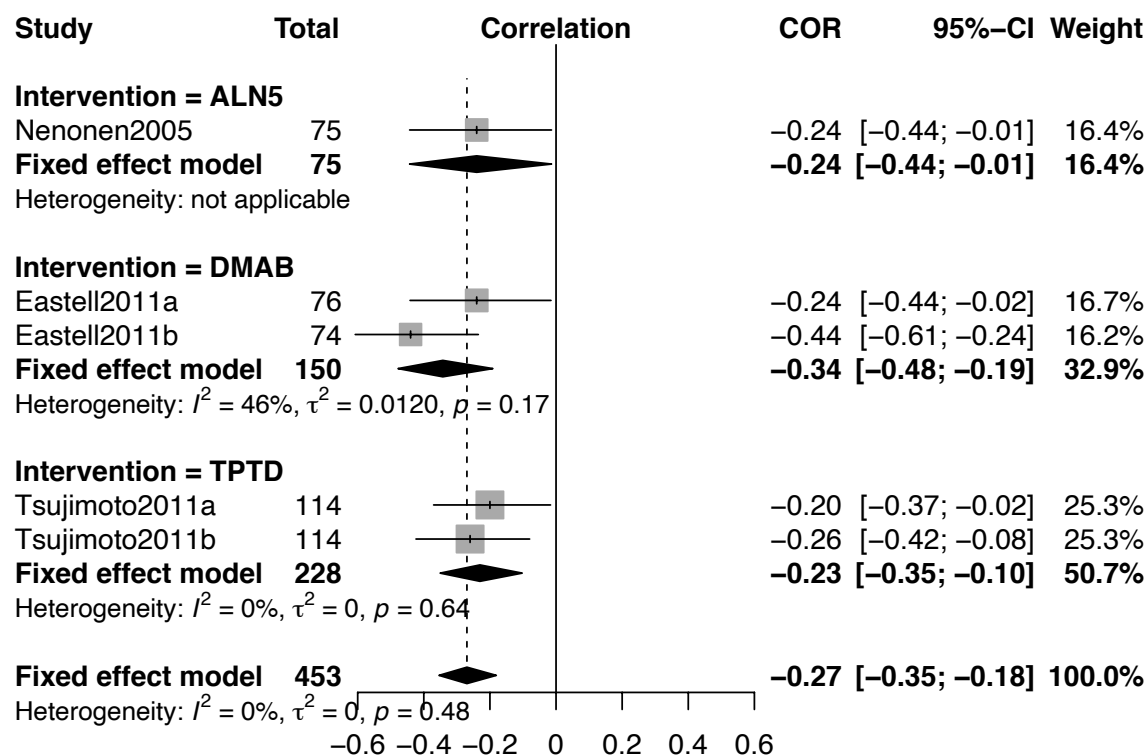

**Figure S3.5.2** Forests of subgroup analyses on the correlation between the changes in S-CTX and BMD by group of intervention. ALN5 5 mg/d Alendronate, DMAB Denosumab, TPTD Teriparatide.

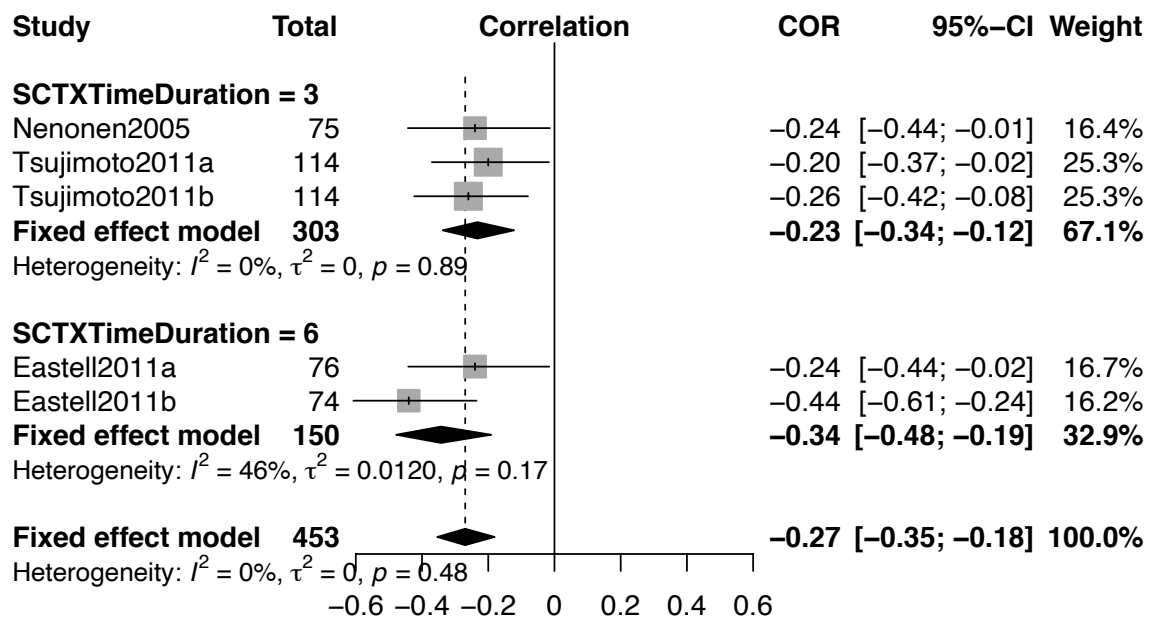

**Figure S3.5.3** Forests of subgroup analyses on the correlation between the changes in S-CTX and BMD by group of the time duration of PINP measurements.

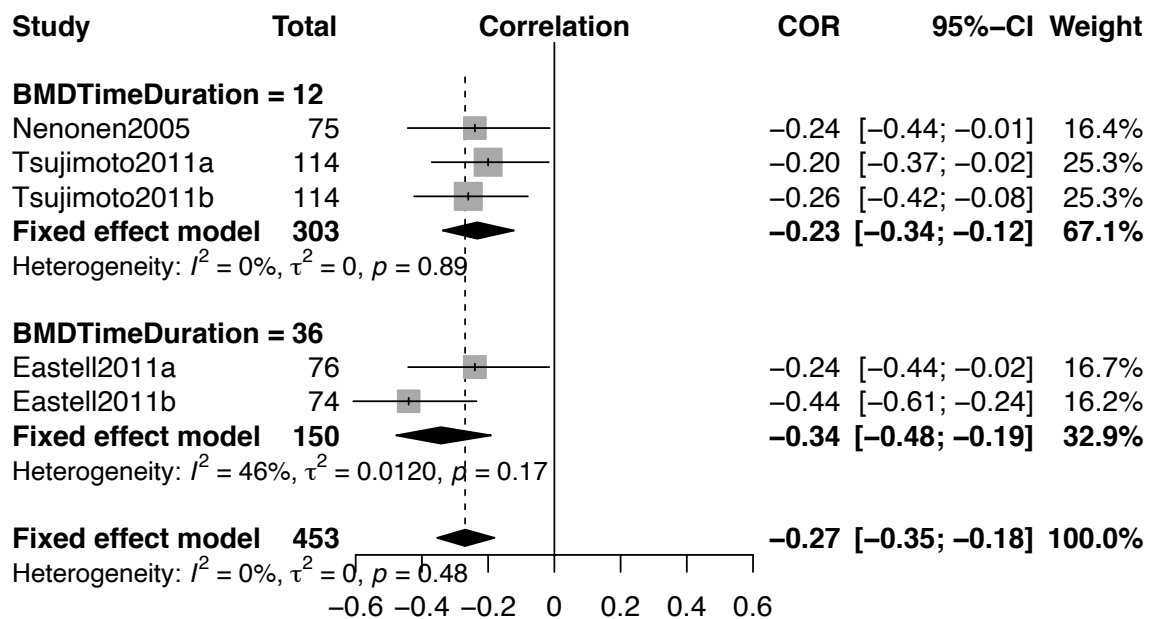

**Figure S3.5.4** Forests of subgroup analyses on the correlation between the changes in S-CTX and BMD by group of the time duration of BMD measurements.

### S3.6 Forests of subgroup analyses on the correlation between the changes in U-NTX and BMD

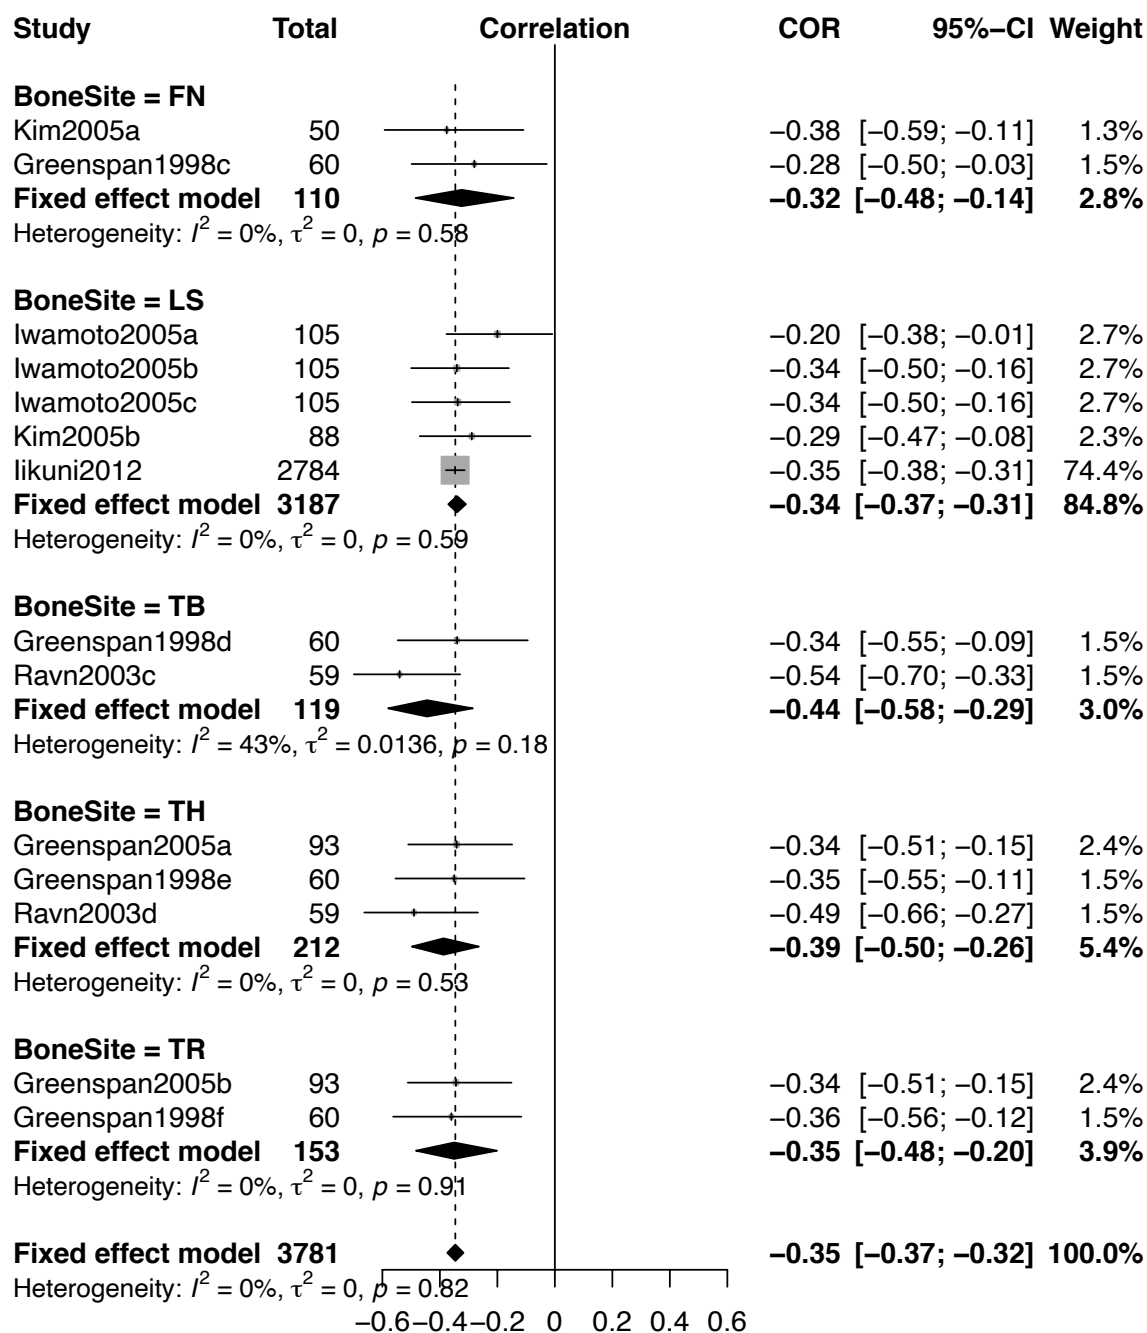

**Figure S3.6.1** Forests of subgroup analyses on the correlation between the changes in U-NTX and BMD by group of bone sites. FN femoral neck, LS lumbar spine, TB total body, TH total hip, TR trochanter.

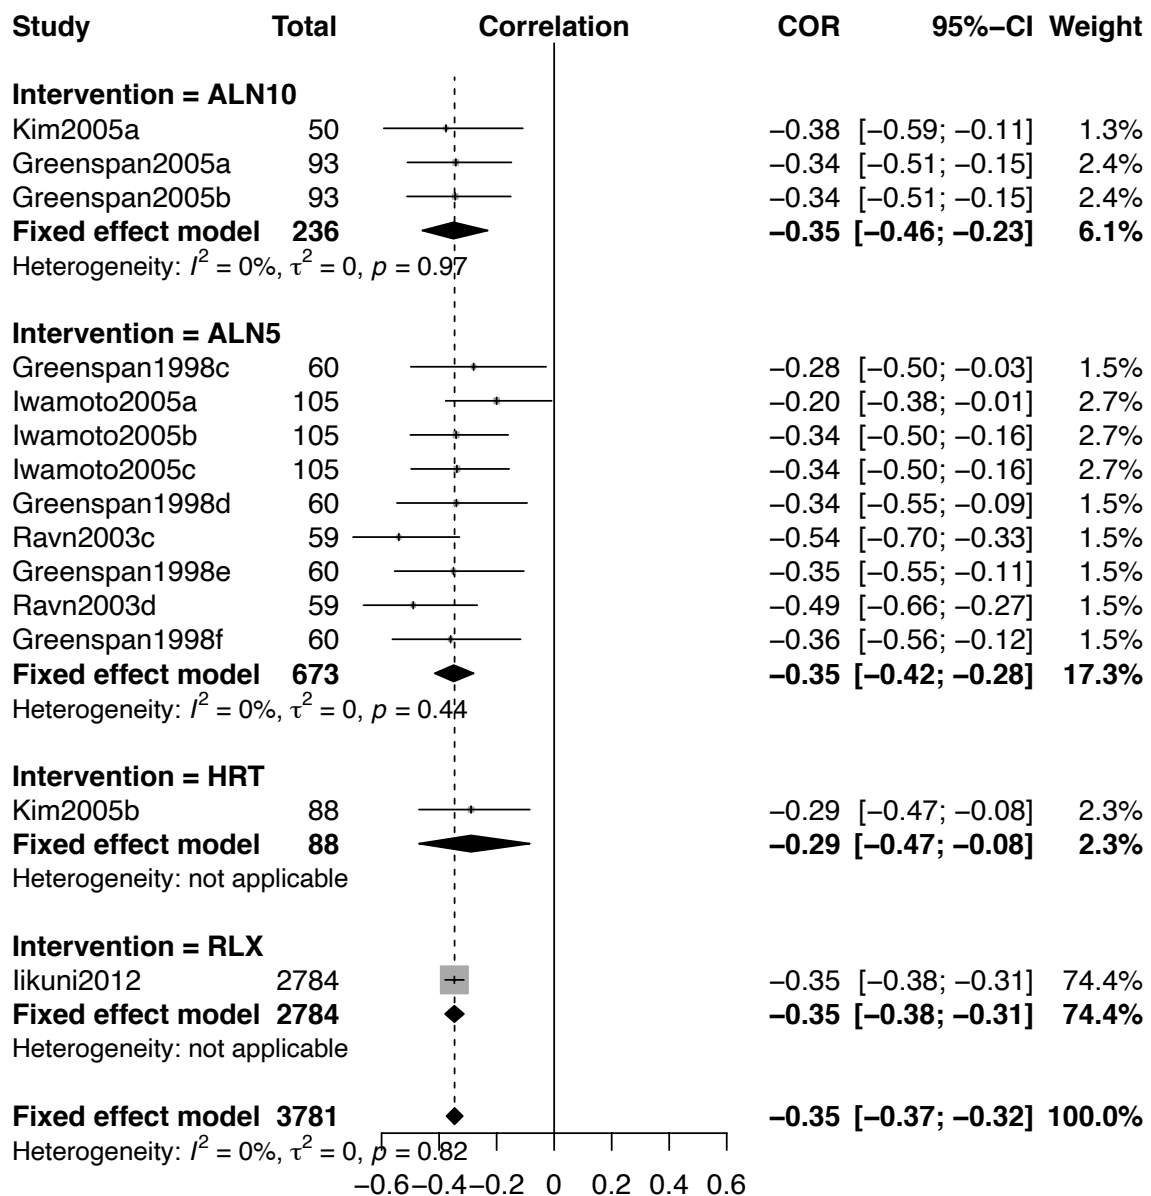

**Figure S3.6.2** Forests of subgroup analyses on the correlation between the changes in U-NTX and BMD by group of intervention. ALN10 10 mg/d Alendronate, ALN5 5 mg/d Alendronate, HRT Hormone replacement, RLX Raloxifene.

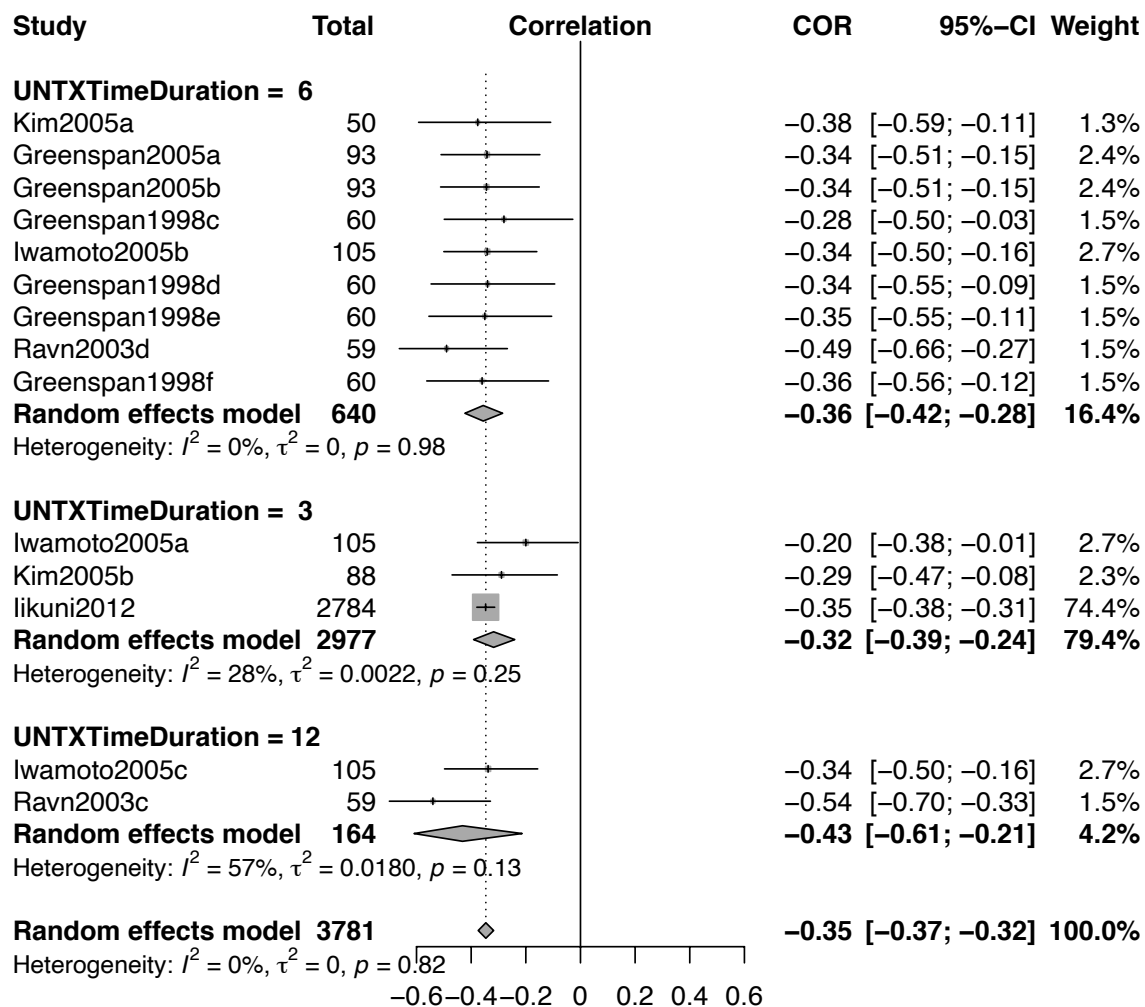

**Figure S3.6.3** Forests of subgroup analyses on the correlation between the changes in U-NTX and BMD by group of the time duration of U-NTX measurements.



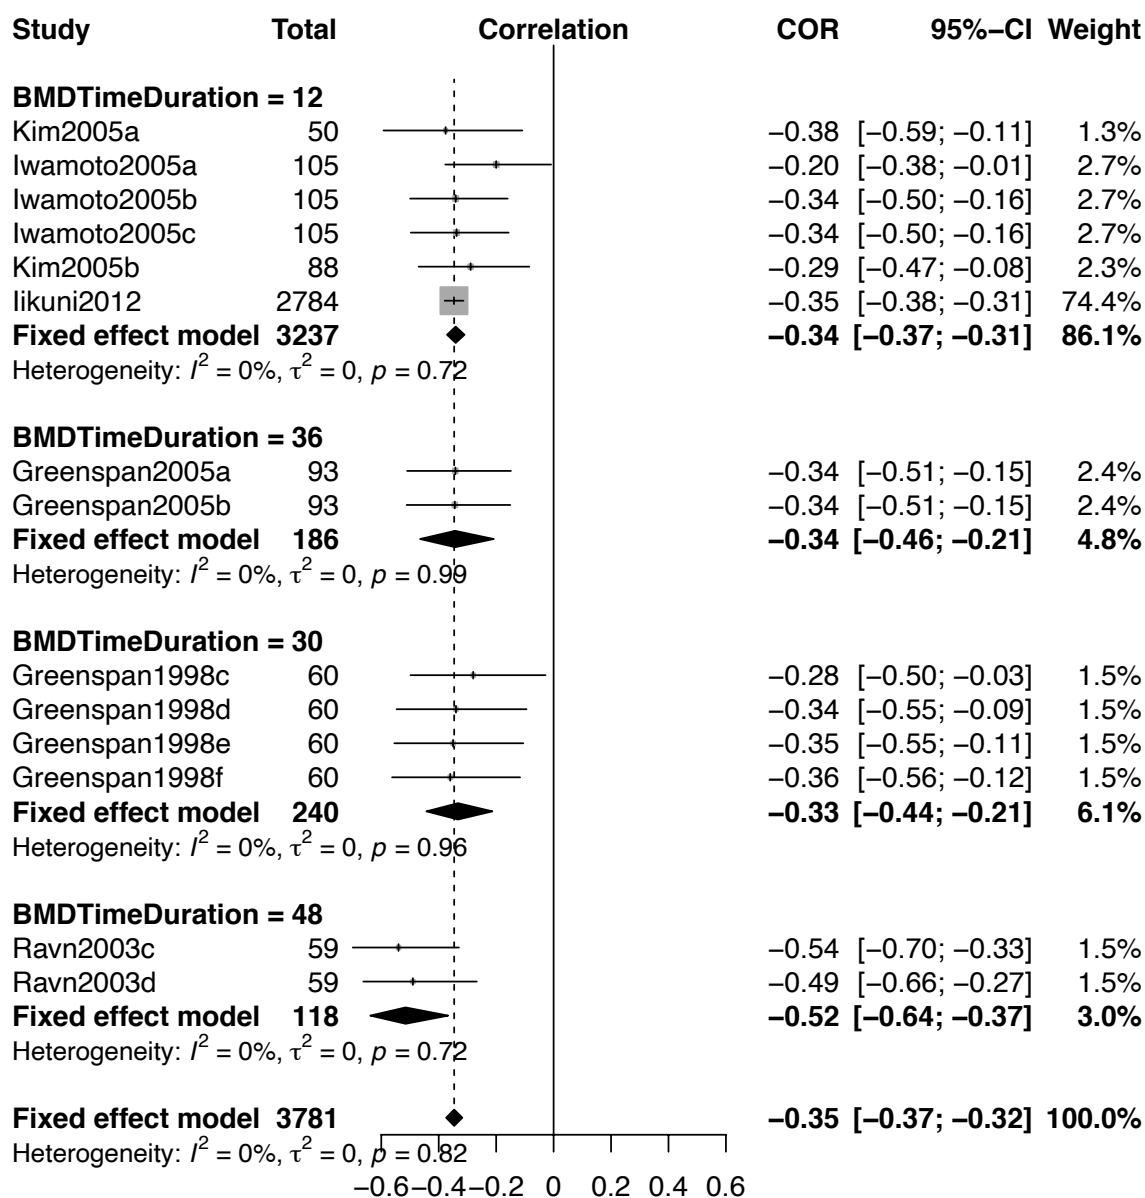

**Figure S3.6.4** Forests of subgroup analyses on the correlation between the changes in U-NTX and BMD by group of the time duration of BMD measurements.
