# Supplementary material
Source: MDPI journal article supplement (https://www.mdpi.com/2076-3417/10/3/832)
Supplement: s1 [file s1]

## Search strategy

### Contents

|   |                                                                                                        |    |
|---|--------------------------------------------------------------------------------------------------------|----|
| 1 | MEDLINE(PubMed).....                                                                                   | 2  |
| 2 | EMBASE .....                                                                                           | 9  |
| 3 | Cochrane Library.....                                                                                  | 12 |
| 4 | Conference Proceedings Citation Index – Science & Science Citation Index Expanded (Web of Science).... | 14 |

From inception to 2018/3/19  
Search results 4,515  
Search items

| Search | Query                                                                                                                                                                                                                                                                                                                                                                                                                                                                                                                                                                                                                                                                                                                                                                                                                                                                                                                                                                                                                                                                                                                                                                                                                                                                                                                                                                                                                                                                                                                                                                                                                                                                                                                                                                                                                                                                                                                                                                                                                                                                                                                                                                                                                                                                                                                                                                                                                                                                                                                                                                                                                                                                                                                                                                                                                                                                                                                                                                                                 | Items found |
|--------|-------------------------------------------------------------------------------------------------------------------------------------------------------------------------------------------------------------------------------------------------------------------------------------------------------------------------------------------------------------------------------------------------------------------------------------------------------------------------------------------------------------------------------------------------------------------------------------------------------------------------------------------------------------------------------------------------------------------------------------------------------------------------------------------------------------------------------------------------------------------------------------------------------------------------------------------------------------------------------------------------------------------------------------------------------------------------------------------------------------------------------------------------------------------------------------------------------------------------------------------------------------------------------------------------------------------------------------------------------------------------------------------------------------------------------------------------------------------------------------------------------------------------------------------------------------------------------------------------------------------------------------------------------------------------------------------------------------------------------------------------------------------------------------------------------------------------------------------------------------------------------------------------------------------------------------------------------------------------------------------------------------------------------------------------------------------------------------------------------------------------------------------------------------------------------------------------------------------------------------------------------------------------------------------------------------------------------------------------------------------------------------------------------------------------------------------------------------------------------------------------------------------------------------------------------------------------------------------------------------------------------------------------------------------------------------------------------------------------------------------------------------------------------------------------------------------------------------------------------------------------------------------------------------------------------------------------------------------------------------------------------|-------------|
| #63    | Search (((((((((((((((((((((((((((((procollagen with propeptide[Title/Abstract]) OR procollagen with peptide[Title/Abstract]) OR collagen with propeptide[Title/Abstract]) OR ((PINP[Title/Abstract] OR P1NP[Title/Abstract]))) OR ((PICP[Title/Abstract] OR P1CP[Title/Abstract]))) OR (((BSAP[Title/Abstract] OR BALP[Title/Abstract] OR BAP[Title/Abstract])) AND (bone OR bones OR biomarker* OR biological marker* OR biochemical marker*)) OR bone specific alkaline phosphatase*[Title/Abstract]) OR bone alkaline phosphatase*[Title/Abstract]) OR bone source alkaline phosphatase*[Title/Abstract]) OR (((NTX[Title/Abstract] OR CTX[Title/Abstract])) AND (bone OR bones OR biomarker* OR biological marker* OR biochemical marker*)) OR crosslaps[Title/Abstract]) OR telopeptide* with collagen[Title/Abstract]) OR n-telopeptide* with collagen[Title/Abstract]) OR c-telopeptide* with collagen[Title/Abstract]) OR ((Oxyproline[Title/Abstract] OR hydroxyproline[Title/Abstract]))) OR ((PYD[Title/Abstract]) AND (bone OR bones OR biomarker* OR biological marker* OR biochemical marker*)) OR pyridinoline[Title/Abstract]) OR deoxypyridinoline[Title/Abstract]) OR ((DPD[Title/Abstract]) AND (bone OR bones OR biomarker* OR biological marker* OR biochemical marker*)) OR bone sialoprotein[Title/Abstract]) OR ((BSP[Title/Abstract]) AND (bone OR bones OR biomarker* OR biological marker* OR biochemical marker*)) OR tartrate-resistant acid phosphatase[Title/Abstract]) OR (((tracp[Title/Abstract] OR TRACP[Title/Abstract])) AND (bone OR bones OR biomarker* OR biological marker* OR biochemical marker*)) OR bone turnover marker*[Title/Abstract]) OR bone with biochemical marker*[Title/Abstract]) OR bone metabolic marker*[Title/Abstract]) OR (((biological marker*[Title/Abstract]) OR biochemical marker*[Title/Abstract]) OR biomarker*[Title/Abstract] with bone*)) OR (((("Bone and Bones"[Mesh]) AND ("Biomarkers, Pharmacological"[Mesh] OR "Biomarkers"[Mesh]))) OR osteocalcin[Title/Abstract]) OR ((OC[Title/Abstract]) AND (bone OR bones OR biomarker* OR biological marker* OR biochemical marker*)) AND (((("Osteoporosis, Postmenopausal"[Mesh] OR "Osteoporosis"[Mesh]) OR osteoporo*[Title/Abstract]) AND (((((((((((((((((((((((("Diphosphonates"[Mesh]) OR "alendronate"[Mesh]) OR "ibandronate"[Mesh]) OR "risedronate"[Mesh]) OR "zoledronic acid"[Mesh]) OR "clodronate"[Mesh]) OR "etidronic acid"[Mesh])) OR ((bisphosphonate*[Title/Abstract]) OR diphosphonate*[Title/Abstract]))) OR ((bisphosphonate* OR diphosphonate*)) OR (ibandronate OR Ibandronic acid OR 114084-78-5 [rn])) OR (((((((((((((((Acide alendronique) OR Acido alendronico) OR Acidum alendronicum) OR Alendronic acid) OR Arendal) OR Fosamax Plus D) OR BINOSTO) OR Adronat) OR Alendronate sodium) OR Alendronate sodium hydrate) OR Alendros) OR Dronal) OR Elandor) OR Fosalan) OR Fosamax) OR Sodium alendronate hydrate) OR Alendronate calcium)) OR | 4,515       |

| Search | Query                                                                                                                                                                                                                                                                                                                                                                                                                                                                                                                                                                                                                                                                                                                                                                                                                                                                                                                                                                                                                                                                                                                                                                                                                                                                                                                                                                                                                                                                                                                                                                                                                                                                                                                                                                                                                                                                                                                                                                                                                                                                                                                                                                                                                                                                                                                                                                                                                                                                                                                                                                                                                                                              | Items found |
|--------|--------------------------------------------------------------------------------------------------------------------------------------------------------------------------------------------------------------------------------------------------------------------------------------------------------------------------------------------------------------------------------------------------------------------------------------------------------------------------------------------------------------------------------------------------------------------------------------------------------------------------------------------------------------------------------------------------------------------------------------------------------------------------------------------------------------------------------------------------------------------------------------------------------------------------------------------------------------------------------------------------------------------------------------------------------------------------------------------------------------------------------------------------------------------------------------------------------------------------------------------------------------------------------------------------------------------------------------------------------------------------------------------------------------------------------------------------------------------------------------------------------------------------------------------------------------------------------------------------------------------------------------------------------------------------------------------------------------------------------------------------------------------------------------------------------------------------------------------------------------------------------------------------------------------------------------------------------------------------------------------------------------------------------------------------------------------------------------------------------------------------------------------------------------------------------------------------------------------------------------------------------------------------------------------------------------------------------------------------------------------------------------------------------------------------------------------------------------------------------------------------------------------------------------------------------------------------------------------------------------------------------------------------------------------|-------------|
|        | ((((((((Ibandronate) OR Acid ibandronico) OR Bondenza) OR Bondronat) OR Bonviva) OR Ibandronate) OR Ibandronic acid)) OR (((((((Risedronate) OR Acide risedronique) OR Acido risedronico) OR Acidum risedronicum) OR Risedronate) OR Risedronic acid) OR Actonel) OR Actonel with Calcium)) OR (((((((Zoledronic acid) OR Aclasta) OR Orazol) OR Reclast) OR Zoledronate) OR Zometa) OR Reclast)) OR (((((((Clodronate) OR Acide clodronique) OR Acido clodronico) OR Clodronic acid) OR Clodronsaeure) OR Bonefos) OR Ostac) OR Clasteon) OR Cl2MDP)) OR (((((((Etidronic acid) OR Etidronate) OR Etidronsaeure) OR Ferrofos) OR EHDP) OR Acidum etidronicum) OR Acido etidronico) OR Acetodiphosphonic acid)) OR ((((((Strontium ranelate) OR Distrontium renelate) OR Osseor) OR Protelos) OR Protos) OR Ranelic acid distrontium salt)) OR (((((((((((((((((((((((((((((((Calcitonin) OR Astronin) OR Biocalcin) OR Bionocalcin) OR Cadens) OR Calciben) OR Calcihexal) OR Calcimar) OR Calcimonta) OR Calcinil) OR Calcioton) OR Calcitonin salmon) OR Calcitonin vom lachs) OR Calcitonin, salmar) OR Calcitonina) OR Calcitoran) OR Calco) OR Calogen) OR Calsynar) OR Caltine) OR Casalm) OR Catonin) OR Cibacalcin*) OR Citonina) OR Eptacalcin) OR Ipocalcin) OR Kalsimin) OR Karil) OR Miacalcin) OR Oseototal) OR Ucecal) OR Tonocalcin) OR Thyrocalcitonin) OR Steocin) OR Staporos) OR Stalcin) OR Sical) OR Salmon calcitonin) OR Salmocalcin) OR Salmofar) OR Salcatyn) OR Salcatonin) OR Salcat) OR Rulicalcin) OR Riostin) OR Quosten) OR Prontocalcin) OR Porostenina) OR Ostostabil) OR Ostosalm) OR Ostora) OR Osteovis) OR Osteobion) OR Osseocalcina)) OR ("Estrogen Replacement Therapy"[Mesh] OR "Hormone Replacement Therapy"[Mesh])) OR (((Estrogen Replacement Therapy) OR Hormone Replacement Therapy) OR Estrogen/progesterone hormone therapy)) OR (((HRT[Title/Abstract]) OR ERT[Title/Abstract]) OR HT[Title/Abstract])) OR (((Denosumab) OR Prolia) OR Xgeva)) OR "Denosumab"[Mesh]) OR "Teriparatide"[Mesh]) OR (((((((((((Teriparatide) OR Parathar) OR human PTH (1-34)) OR 1-34-parathormone human) OR Forteo) OR HPTH 1-34) OR HSDB) OR Parathyroid hormone peptide (1-34)) OR human parathyroid hormone (1-34)) OR human parathormone (1-34)) OR Teriparatida) OR Teriparatidum)) OR "Raloxifene Hydrochloride"[Mesh]) OR (((((((Raloxifene) OR Evista) OR HSDB) OR PharoXifene) OR CCRIS) OR Raloxifeno) OR Raloxifenum))) OR ((treatment*[Title/Abstract] OR treat[Title/Abstract] OR treated[Title/Abstract] OR treats[Title/Abstract] OR therap*[Title/Abstract]))) NOT ((animals[MeSH Terms]) NOT human*[MeSH Terms]) |             |
| #62    | Search (animals[MeSH Terms]) NOT human*[MeSH Terms]                                                                                                                                                                                                                                                                                                                                                                                                                                                                                                                                                                                                                                                                                                                                                                                                                                                                                                                                                                                                                                                                                                                                                                                                                                                                                                                                                                                                                                                                                                                                                                                                                                                                                                                                                                                                                                                                                                                                                                                                                                                                                                                                                                                                                                                                                                                                                                                                                                                                                                                                                                                                                | 4,420,592   |
| #61    | Search human*[MeSH Terms]                                                                                                                                                                                                                                                                                                                                                                                                                                                                                                                                                                                                                                                                                                                                                                                                                                                                                                                                                                                                                                                                                                                                                                                                                                                                                                                                                                                                                                                                                                                                                                                                                                                                                                                                                                                                                                                                                                                                                                                                                                                                                                                                                                                                                                                                                                                                                                                                                                                                                                                                                                                                                                          | 17,167,925  |
| #60    | Search animals[MeSH Terms]                                                                                                                                                                                                                                                                                                                                                                                                                                                                                                                                                                                                                                                                                                                                                                                                                                                                                                                                                                                                                                                                                                                                                                                                                                                                                                                                                                                                                                                                                                                                                                                                                                                                                                                                                                                                                                                                                                                                                                                                                                                                                                                                                                                                                                                                                                                                                                                                                                                                                                                                                                                                                                         | 21,377,315  |
| #59    | Search (((((((((((((((((((((((((((procollagen with propeptide[Title/Abstract]) OR procollagen with peptide[Title/Abstract]) OR collagen with propeptide[Title/Abstract]) OR ((PINP[Title/Abstract] OR PINP[Title/Abstract]))) OR ((PICP[Title/Abstract] OR                                                                                                                                                                                                                                                                                                                                                                                                                                                                                                                                                                                                                                                                                                                                                                                                                                                                                                                                                                                                                                                                                                                                                                                                                                                                                                                                                                                                                                                                                                                                                                                                                                                                                                                                                                                                                                                                                                                                                                                                                                                                                                                                                                                                                                                                                                                                                                                                         | 5,631       |

| Search | Query                                                                                                                                                                                                                                                                                                                                                                                                                                                                                                                                                                                                                                                                                                                                                                                                                                                                                                                                                                                                                                                                                                                                                                                                                                                                                                                                                                                                                                                                                                                                                                                                                                                                                                                                                                                                                                                                                                                                                                                                                                                                                                                                                                                                                                                                                                                                                                                                                                                                                                                                                                                                                                                                                                                                                                                                                                                                                                                                                                                                                                                                                                                                                                                                                                                                                                                                                                                                                  | Items found |
|--------|------------------------------------------------------------------------------------------------------------------------------------------------------------------------------------------------------------------------------------------------------------------------------------------------------------------------------------------------------------------------------------------------------------------------------------------------------------------------------------------------------------------------------------------------------------------------------------------------------------------------------------------------------------------------------------------------------------------------------------------------------------------------------------------------------------------------------------------------------------------------------------------------------------------------------------------------------------------------------------------------------------------------------------------------------------------------------------------------------------------------------------------------------------------------------------------------------------------------------------------------------------------------------------------------------------------------------------------------------------------------------------------------------------------------------------------------------------------------------------------------------------------------------------------------------------------------------------------------------------------------------------------------------------------------------------------------------------------------------------------------------------------------------------------------------------------------------------------------------------------------------------------------------------------------------------------------------------------------------------------------------------------------------------------------------------------------------------------------------------------------------------------------------------------------------------------------------------------------------------------------------------------------------------------------------------------------------------------------------------------------------------------------------------------------------------------------------------------------------------------------------------------------------------------------------------------------------------------------------------------------------------------------------------------------------------------------------------------------------------------------------------------------------------------------------------------------------------------------------------------------------------------------------------------------------------------------------------------------------------------------------------------------------------------------------------------------------------------------------------------------------------------------------------------------------------------------------------------------------------------------------------------------------------------------------------------------------------------------------------------------------------------------------------------------|-------------|
|        | <p> PICP[Title/Abstract])) OR (((BSAP[Title/Abstract] OR BALP[Title/Abstract] OR BAP[Title/Abstract])) AND (bone OR bones OR biomarker* OR biological marker* OR biochemical marker*)) OR bone specific alkaline phosphatase*[Title/Abstract]) OR bone alkaline phosphatase*[Title/Abstract]) OR bone source alkaline phosphatase*[Title/Abstract]) OR (((NTX[Title/Abstract] OR CTX[Title/Abstract])) AND (bone OR bones OR biomarker* OR biological marker* OR biochemical marker*)) OR crosslaps[Title/Abstract]) OR telopeptide* with collagen[Title/Abstract]) OR n-telopeptide* with collagen[Title/Abstract]) OR c-telopeptide* with collagen[Title/Abstract]) OR ((Oxyproline[Title/Abstract] OR hydroxyproline[Title/Abstract])) OR ((PYD[Title/Abstract]) AND (bone OR bones OR biomarker* OR biological marker* OR biochemical marker*)) OR pyridinoline[Title/Abstract]) OR deoxypyridinoline[Title/Abstract]) OR ((DPD[Title/Abstract]) AND (bone OR bones OR biomarker* OR biological marker* OR biochemical marker*)) OR bone sialoprotein[Title/Abstract]) OR ((BSP[Title/Abstract]) AND (bone OR bones OR biomarker* OR biological marker* OR biochemical marker*)) OR tartrate-resistant acid phosphatase[Title/Abstract]) OR (((tracp[Title/Abstract] OR TRACP[Title/Abstract])) AND (bone OR bones OR biomarker* OR biological marker* OR biochemical marker*)) OR bone turnover marker*[Title/Abstract]) OR bone with biochemical marker*[Title/Abstract]) OR bone metabolic marker*[Title/Abstract]) OR (((((biological marker*[Title/Abstract]) OR biochemical marker*[Title/Abstract]) OR biomarker*[Title/Abstract] with bone*))) OR (((("Bone and Bones"[Mesh])) AND ("Biomarkers, Pharmacological"[Mesh] OR "Biomarkers"[Mesh])) OR osteocalcin[Title/Abstract]) OR ((OC[Title/Abstract]) AND (bone OR bones OR biomarker* OR biological marker* OR biochemical marker*))) AND (((("Osteoporosis, Postmenopausal"[Mesh] OR "Osteoporosis"[Mesh])) OR osteoporo*[Title/Abstract])) AND (((((((((((((((((((("Diphosphonates"[Mesh] OR "alendronate"[Mesh] OR "ibandronate"[Mesh] OR "risedronate"[Mesh] OR "zoledronic acid"[Mesh] OR "clodronate"[Mesh] OR "etidronic acid"[Mesh])) OR ((bisphosphonate*[Title/Abstract]) OR diphosphonate*[Title/Abstract])) OR ((bisphosphonate* OR diphosphonate*)) OR (ibandronate OR Ibandronic acid OR 114084-78-5 [rn])) OR (((((((((((Acide alendronique) OR Acido alendronico) OR Acidum alendronicum) OR Alendronic acid) OR Arendal) OR Fosamax Plus D) OR BINOSTO) OR Adronat) OR Alendronate sodium) OR Alendronate sodium hydrate) OR Alendros) OR Dronal) OR Elandor) OR Fosalan) OR Fosamax) OR Sodium alendronate hydrate) OR Alendronate calcium)) OR ((((((Ibandronate) OR Acid ibandronico) OR Bondenza) OR Bondronat) OR Bonviva) OR Ibandronate) OR Ibandronic acid)) OR ((((((Risedronate) OR Acide risedronique) OR Acido risedronico) OR Acidum risedronicum) OR Risedronate) OR Risedronic acid) OR Actonel) OR Actonel with Calcium)) OR ((((((Zoledronic acid) OR Aclasta) OR Orazol) OR Reclast) OR Zoledronate) OR Zometa) OR Reclast)) OR (((((((Clodronate) OR Acide clodronique) OR Acido clodronico) OR Clodronic acid) OR Clodronsaeure) OR Bonefos) OR Ostac) OR Clasteon) OR Cl2MDP)) OR (((((((Etidronic acid) OR Etidronate) OR Etidronsaeure) OR Ferrofos) OR EHDP) OR Acidum etidronicum) OR Acido etidronico) </p> |             |





| Search | Query                                                                                                                                                                                                                                                                                                                                                                                                                                                                                                                                                                                                                                                                          | Items found |
|--------|--------------------------------------------------------------------------------------------------------------------------------------------------------------------------------------------------------------------------------------------------------------------------------------------------------------------------------------------------------------------------------------------------------------------------------------------------------------------------------------------------------------------------------------------------------------------------------------------------------------------------------------------------------------------------------|-------------|
|        | Calcimonta) OR Calcinil) OR Calciton) OR Calcitonin salmon) OR Calcitonin vom lachs) OR Calcitonin, salmar) OR Calcitonina) OR Calcitoran) OR Calco) OR Calogen) OR Calsynar) OR Caltine) OR Casalm) OR Catonin) OR Cibacalcin*) OR Citonina) OR Eptacalcin) OR Ipocalcin) OR Kalsimin) OR Karil) OR Miacalcin) OR Oseototal) OR Ucecal) OR Tonocalcin) OR Thyrocalcitonin) OR Steocin) OR Staporos) OR Stalcin) OR Sical) OR Salmon calcitonin) OR Salmocalcin) OR Salmofar) OR Salcatyn) OR Salcatonin) OR Salcat) OR Rulicalcin) OR Riostin) OR Quosten) OR Prontocalcin) OR Porostenina) OR Ostostabil) OR Ostosalm) OR Ostora) OR Osteovis) OR Osteobion) OR Osseocalcina |             |
| #46    | Search ((((((Strontium ranelate) OR Distrontium renelate) OR Osseor) OR Protelos) OR Protos) OR Ranelic acid distrontium salt                                                                                                                                                                                                                                                                                                                                                                                                                                                                                                                                                  | 787         |
| #45    | Search (((((((Etidronic acid) OR Etidronate) OR Etidronsaeure) OR Ferrofos) OR EHDP) OR Acidum etidronicum) OR Acido etidronico) OR Acetodiphosphonic acid                                                                                                                                                                                                                                                                                                                                                                                                                                                                                                                     | 3,696       |
| #44    | Search (((((((((Clodronate) OR Acide clodronique) OR Acido clodronico) OR Clodronic acid) OR Clodronsaeure) OR Bonefos) OR Ostac) OR Clasteon) OR Cl2MDP                                                                                                                                                                                                                                                                                                                                                                                                                                                                                                                       | 2,455       |
| #43    | Search (((((((Zoledronic acid) OR Aclasta) OR Orazol) OR Reclast) OR Zoledronate) OR Zometa) OR Reclast                                                                                                                                                                                                                                                                                                                                                                                                                                                                                                                                                                        | 4,566       |
| #42    | Search (((((((((Risedronate) OR Acide risedronique) OR Acido risedronico) OR Acidum risedronicum) OR Risedronate) OR Risedronic acid) OR Actonel) OR Actonel with Calcium                                                                                                                                                                                                                                                                                                                                                                                                                                                                                                      | 2,077       |
| #41    | Search (((((((Ibandronate) OR Acid ibandronico) OR Bondenza) OR Bondronat) OR Bonviva) OR Ibandronate) OR Ibandronic acid                                                                                                                                                                                                                                                                                                                                                                                                                                                                                                                                                      | 2,783,821   |
| #40    | Search (((((((((((Acide alendronique) OR Acido alendronico) OR Acidum alendronicum) OR Alendronic acid) OR Arendal) OR Fosamax Plus D) OR BINOSTO) OR Adronat) OR Alendronate sodium) OR Alendronate sodium hydrate) OR Alendros) OR Dronal) OR Elandor) OR Fosalan) OR Fosamax) OR Sodium alendronate hydrate) OR Alendronate calcium                                                                                                                                                                                                                                                                                                                                         | 5,550       |
| #39    | Search ibandronate OR Ibandronic acid OR 114084-78-5 [rn] Sort by: PublicationDate                                                                                                                                                                                                                                                                                                                                                                                                                                                                                                                                                                                             | 1,092       |
| #38    | Search (bisphosphonate* OR diphosphonate*)                                                                                                                                                                                                                                                                                                                                                                                                                                                                                                                                                                                                                                     | 24,950      |
| #37    | Search ((bisphosphonate*[Title/Abstract]) OR diphosphonate*[Title/Abstract])                                                                                                                                                                                                                                                                                                                                                                                                                                                                                                                                                                                                   | 18,570      |
| #36    | Search (((((((("Diphosphonates"[Mesh]) OR "alendronate"[Mesh]) OR "ibandronate"[Mesh]) OR "risedronate"[Mesh]) OR "zoledronic acid"[Mesh]) OR "clodronate"[Mesh]) OR "etidronic acid"[Mesh]                                                                                                                                                                                                                                                                                                                                                                                                                                                                                    | 23,765      |
| #35    | Search (("Osteoporosis, Postmenopausal"[Mesh] OR "Osteoporosis"[Mesh])) OR osteoporo*[Title/Abstract]                                                                                                                                                                                                                                                                                                                                                                                                                                                                                                                                                                          | 81,233      |
| #34    | Search "Osteoporosis, Postmenopausal"[Mesh] OR "Osteoporosis"[Mesh] Sort by: PublicationDate                                                                                                                                                                                                                                                                                                                                                                                                                                                                                                                                                                                   | 51,018      |
| #33    | Search osteoporo*[Title/Abstract]                                                                                                                                                                                                                                                                                                                                                                                                                                                                                                                                                                                                                                              | 67,306      |
| #32    | Search (((((((((((((((procollagen with propeptide[Title/Abstract]) OR procollagen with peptide[Title/Abstract]) OR collagen with propeptide[Title/Abstract]) OR ((PINP[Title/Abstract] OR P1NP[Title/Abstract]))) OR ((PICP[Title/Abstract] OR P1CP[Title/Abstract]))) OR ((BSAP[Title/Abstract] OR BALP[Title/Abstract] OR                                                                                                                                                                                                                                                                                                                                                    | 51,775      |

| Search | Query                                                                                                                                                                                                                                                                                                                                                                                                                                                                                                                                                                                                                                                                                                                                                                                                                                                                                                                                                                                                                                                                                                                                                                                                                                                                                                                                                                                                                                                                                                                                                                                                                                                                                                                                                                                                                 | Items found |
|--------|-----------------------------------------------------------------------------------------------------------------------------------------------------------------------------------------------------------------------------------------------------------------------------------------------------------------------------------------------------------------------------------------------------------------------------------------------------------------------------------------------------------------------------------------------------------------------------------------------------------------------------------------------------------------------------------------------------------------------------------------------------------------------------------------------------------------------------------------------------------------------------------------------------------------------------------------------------------------------------------------------------------------------------------------------------------------------------------------------------------------------------------------------------------------------------------------------------------------------------------------------------------------------------------------------------------------------------------------------------------------------------------------------------------------------------------------------------------------------------------------------------------------------------------------------------------------------------------------------------------------------------------------------------------------------------------------------------------------------------------------------------------------------------------------------------------------------|-------------|
|        | BAP[Title/Abstract])) AND (bone OR bones OR biomarker* OR biological marker* OR biochemical marker*)) OR bone specific alkaline phosphatase*[Title/Abstract]) OR bone alkaline phosphatase*[Title/Abstract]) OR bone source alkaline phosphatase*[Title/Abstract]) OR (((NTX[Title/Abstract] OR CTX[Title/Abstract])) AND (bone OR bones OR biomarker* OR biological marker* OR biochemical marker*)) OR crosslaps[Title/Abstract]) OR telopeptide* with collagen[Title/Abstract]) OR n-telopeptide* with collagen[Title/Abstract]) OR c-telopeptide* with collagen[Title/Abstract]) OR (((Oxyproline[Title/Abstract] OR hydroxyproline[Title/Abstract])) OR ((PYD[Title/Abstract]) AND (bone OR bones OR biomarker* OR biological marker* OR biochemical marker*)) OR pyridinoline[Title/Abstract]) OR deoxypyridinoline[Title/Abstract]) OR ((DPD[Title/Abstract]) AND (bone OR bones OR biomarker* OR biological marker* OR biochemical marker*)) OR bone sialoprotein[Title/Abstract]) OR ((BSP[Title/Abstract]) AND (bone OR bones OR biomarker* OR biological marker* OR biochemical marker*)) OR tartrate-resistant acid phosphatase[Title/Abstract]) OR (((tracp[Title/Abstract] OR TRACP[Title/Abstract])) AND (bone OR bones OR biomarker* OR biological marker* OR biochemical marker*)) OR bone turnover marker*[Title/Abstract]) OR bone with biochemical marker*[Title/Abstract]) OR bone metabolic marker*[Title/Abstract]) OR (((((biological marker*[Title/Abstract]) OR biochemical marker*[Title/Abstract]) OR biomarker*[Title/Abstract] with bone*)))) OR (((("Bone and Bones"[Mesh])) AND ("Biomarkers, Pharmacological"[Mesh] OR "Biomarkers"[Mesh])) OR osteocalcin[Title/Abstract]) OR ((OC[Title/Abstract]) AND (bone OR bones OR biomarker* OR biological marker* OR biochemical marker*)) |             |
| #31    | Search (OC[Title/Abstract]) AND (bone OR bones OR biomarker* OR biological marker* OR biochemical marker*)                                                                                                                                                                                                                                                                                                                                                                                                                                                                                                                                                                                                                                                                                                                                                                                                                                                                                                                                                                                                                                                                                                                                                                                                                                                                                                                                                                                                                                                                                                                                                                                                                                                                                                            | 3,950       |
| #30    | Search osteocalcin[Title/Abstract]                                                                                                                                                                                                                                                                                                                                                                                                                                                                                                                                                                                                                                                                                                                                                                                                                                                                                                                                                                                                                                                                                                                                                                                                                                                                                                                                                                                                                                                                                                                                                                                                                                                                                                                                                                                    | 14,914      |
| #29    | Search (("Bone and Bones"[Mesh])) AND ("Biomarkers, Pharmacological"[Mesh] OR "Biomarkers"[Mesh])                                                                                                                                                                                                                                                                                                                                                                                                                                                                                                                                                                                                                                                                                                                                                                                                                                                                                                                                                                                                                                                                                                                                                                                                                                                                                                                                                                                                                                                                                                                                                                                                                                                                                                                     | 7,768       |
| #28    | Search "Bone and Bones"[Mesh] Sort by: PublicationDate                                                                                                                                                                                                                                                                                                                                                                                                                                                                                                                                                                                                                                                                                                                                                                                                                                                                                                                                                                                                                                                                                                                                                                                                                                                                                                                                                                                                                                                                                                                                                                                                                                                                                                                                                                | 558,242     |
| #27    | Search "Biomarkers, Pharmacological"[Mesh] OR "Biomarkers"[Mesh] Sort by: PublicationDate                                                                                                                                                                                                                                                                                                                                                                                                                                                                                                                                                                                                                                                                                                                                                                                                                                                                                                                                                                                                                                                                                                                                                                                                                                                                                                                                                                                                                                                                                                                                                                                                                                                                                                                             | 640,956     |
| #26    | Search (((((biological marker*[Title/Abstract]) OR biochemical marker*[Title/Abstract]) OR biomarker*[Title/Abstract] with bone*)))                                                                                                                                                                                                                                                                                                                                                                                                                                                                                                                                                                                                                                                                                                                                                                                                                                                                                                                                                                                                                                                                                                                                                                                                                                                                                                                                                                                                                                                                                                                                                                                                                                                                                   | 9,031       |
| #25    | Search bone metabolic marker*[Title/Abstract]                                                                                                                                                                                                                                                                                                                                                                                                                                                                                                                                                                                                                                                                                                                                                                                                                                                                                                                                                                                                                                                                                                                                                                                                                                                                                                                                                                                                                                                                                                                                                                                                                                                                                                                                                                         | 319         |
| #24    | Search bone with biochemical marker*[Title/Abstract]                                                                                                                                                                                                                                                                                                                                                                                                                                                                                                                                                                                                                                                                                                                                                                                                                                                                                                                                                                                                                                                                                                                                                                                                                                                                                                                                                                                                                                                                                                                                                                                                                                                                                                                                                                  | 3,383       |
| #23    | Search bone turnover marker*[Title/Abstract]                                                                                                                                                                                                                                                                                                                                                                                                                                                                                                                                                                                                                                                                                                                                                                                                                                                                                                                                                                                                                                                                                                                                                                                                                                                                                                                                                                                                                                                                                                                                                                                                                                                                                                                                                                          | 2,718       |
| #22    | Search ((tracp[Title/Abstract] OR TRACP[Title/Abstract])) AND (bone OR bones OR biomarker* OR biological marker* OR biochemical marker*)                                                                                                                                                                                                                                                                                                                                                                                                                                                                                                                                                                                                                                                                                                                                                                                                                                                                                                                                                                                                                                                                                                                                                                                                                                                                                                                                                                                                                                                                                                                                                                                                                                                                              | 535         |
| #21    | Search tartrate-resistant acid phosphatase[Title/Abstract]                                                                                                                                                                                                                                                                                                                                                                                                                                                                                                                                                                                                                                                                                                                                                                                                                                                                                                                                                                                                                                                                                                                                                                                                                                                                                                                                                                                                                                                                                                                                                                                                                                                                                                                                                            | 4,135       |
| #20    | Search (BSP[Title/Abstract]) AND (bone OR bones OR biomarker* OR biological marker* OR biochemical marker*)                                                                                                                                                                                                                                                                                                                                                                                                                                                                                                                                                                                                                                                                                                                                                                                                                                                                                                                                                                                                                                                                                                                                                                                                                                                                                                                                                                                                                                                                                                                                                                                                                                                                                                           | 1,277       |
| #19    | Search bone sialoprotein[Title/Abstract]                                                                                                                                                                                                                                                                                                                                                                                                                                                                                                                                                                                                                                                                                                                                                                                                                                                                                                                                                                                                                                                                                                                                                                                                                                                                                                                                                                                                                                                                                                                                                                                                                                                                                                                                                                              | 2,069       |



| Search | Query                                                                                                                                                         | Items found |
|--------|---------------------------------------------------------------------------------------------------------------------------------------------------------------|-------------|
| #18    | Search (DPD[Title/Abstract]) AND (bone OR bones OR biomarker* OR biological marker* OR biochemical marker*)                                                   | 1,002       |
| #17    | Search deoxypyridinoline[Title/Abstract]                                                                                                                      | 2,049       |
| #16    | Search pyridinoline[Title/Abstract]                                                                                                                           | 1,533       |
| #15    | Search (PYD[Title/Abstract]) AND (bone OR bones OR biomarker* OR biological marker* OR biochemical marker*)                                                   | 300         |
| #14    | Search (Oxyproline[Title/Abstract] OR hydroxyproline[Title/Abstract])                                                                                         | 12,522      |
| #13    | Search c-telopeptide* with collagen[Title/Abstract]                                                                                                           | 820         |
| #12    | Search n-telopeptide* with collagen[Title/Abstract]                                                                                                           | 884         |
| #11    | Search telopeptide* with collagen[Title/Abstract]                                                                                                             | 4,284       |
| #10    | Search crosslaps[Title/Abstract]                                                                                                                              | 455         |
| #9     | Search ((NTX[Title/Abstract] OR CTX[Title/Abstract])) AND (bone OR bones OR biomarker* OR biological marker* OR biochemical marker*)                          | 3,644       |
| #8     | Search bone source alkaline phosphatase*[Title/Abstract]                                                                                                      | 504         |
| #7     | Search bone alkaline phosphatase*[Title/Abstract]                                                                                                             | 1,546       |
| #6     | Search bone specific alkaline phosphatase*[Title/Abstract]                                                                                                    | 1,711       |
| #5     | Search ((BSAP[Title/Abstract] OR BALP[Title/Abstract] OR BAP[Title/Abstract])) AND (bone OR bones OR biomarker* OR biological marker* OR biochemical marker*) | 1,830       |
| #4     | Search collagen with propeptide[Title/Abstract]                                                                                                               | 2,814       |
| #3     | Search procollagen with peptide[Title/Abstract]                                                                                                               | 1,610       |
| #2     | Search procollagen with propeptide[Title/Abstract]                                                                                                            | 2,575       |
| #1     | Search (PINP[Title/Abstract] OR PICP[Title/Abstract] OR P1NP[Title/Abstract] OR P1CP[Title/Abstract])                                                         | 2,117       |

## 2 EMBASE

From inception to 2018/3/22

Search results 7,782

Search items

| No. | Query                                                                                                                                                                              | Results    |
|-----|------------------------------------------------------------------------------------------------------------------------------------------------------------------------------------|------------|
| #80 | #73 NOT #79                                                                                                                                                                        | 7,782      |
| #79 | #76 NOT #78                                                                                                                                                                        | 6,346,461  |
| #78 | #76 AND #77                                                                                                                                                                        | 19,226,763 |
| #77 | 'human'/exp                                                                                                                                                                        | 19,226,763 |
| #76 | #74 OR #75                                                                                                                                                                         | 25,573,224 |
| #75 | 'nonhuman'/exp                                                                                                                                                                     | 5,355,039  |
| #74 | 'animal'/exp                                                                                                                                                                       | 24,234,136 |
| #73 | #42 AND #45 AND #72                                                                                                                                                                | 9,856      |
| #72 | #46 OR #47 OR #48 OR #49 OR #50 OR #51 OR #52 OR #53 OR #54 OR #55 OR #56 OR #57 OR #58 OR #59 OR #60 OR #61 OR #62 OR #63 OR #64 OR #65 OR #66 OR #67 OR #68 OR #69 OR #70 OR #71 | 8,661,858  |

| No. | Query                                                                                                                                                                                                                                                                                                                                                                                                                                                                                                                                                                                                                                                                                                                                            | Results   |
|-----|--------------------------------------------------------------------------------------------------------------------------------------------------------------------------------------------------------------------------------------------------------------------------------------------------------------------------------------------------------------------------------------------------------------------------------------------------------------------------------------------------------------------------------------------------------------------------------------------------------------------------------------------------------------------------------------------------------------------------------------------------|-----------|
| #71 | treatment* OR treat OR treated OR treats OR therap*:ti,ab                                                                                                                                                                                                                                                                                                                                                                                                                                                                                                                                                                                                                                                                                        | 8,597,473 |
| #70 | raloxifene OR evista OR hsdh OR pharoxifene OR ccris OR raloxifeno OR raloxifenum                                                                                                                                                                                                                                                                                                                                                                                                                                                                                                                                                                                                                                                                | 11,004    |
| #69 | 'raloxifene'/de                                                                                                                                                                                                                                                                                                                                                                                                                                                                                                                                                                                                                                                                                                                                  | 10,619    |
| #68 | teriparatide OR parathar OR 'human pth (1-34)' OR '1-34-parathormone human' OR forteo OR 'hpth 1-34' OR hsdh OR 'parathyroid hormone peptide (1-34)' OR 'human parathyroid hormone (1-34)' OR 'human parathormone (1-34)' OR teriparatida OR teriparatidum                                                                                                                                                                                                                                                                                                                                                                                                                                                                                       | 3,822     |
| #67 | 'teriparatide'/de                                                                                                                                                                                                                                                                                                                                                                                                                                                                                                                                                                                                                                                                                                                                | 6,302     |
| #66 | denosumab OR prolia OR xgeva                                                                                                                                                                                                                                                                                                                                                                                                                                                                                                                                                                                                                                                                                                                     | 6,691     |
| #65 | 'denosumab'/de                                                                                                                                                                                                                                                                                                                                                                                                                                                                                                                                                                                                                                                                                                                                   | 6,409     |
| #64 | 'estrogen replacement therapy' OR 'hormone replacement therapy' OR 'estrogen/progesterone hormone therapy' OR 'estrogen therapy'                                                                                                                                                                                                                                                                                                                                                                                                                                                                                                                                                                                                                 | 39,565    |
| #63 | 'hormone replacement therapy'/de                                                                                                                                                                                                                                                                                                                                                                                                                                                                                                                                                                                                                                                                                                                 | 34,257    |
| #62 | 'estrogen replacement therapy'/de                                                                                                                                                                                                                                                                                                                                                                                                                                                                                                                                                                                                                                                                                                                | 22,441    |
| #61 | calcitonin OR astronin OR biocalcin OR bionocalcin OR cadens OR calciben OR calcihexal OR calcimar OR calcimonta OR calcinil OR calcioton OR 'calcitonin salmon' OR 'calcitonin vom lachs' OR 'calcitonin, salmar' OR calcitonina OR calcitoran OR calco OR calogen OR calsynar OR caltine OR casalm OR catonin OR cibacalcin* OR citonina OR eptacalcin OR ipocalcin OR kalsimin OR karil OR miacalcin OR oseototal OR ucecal OR tonocalcin OR thyrocalcitonin OR steocin OR staporos OR stalcin OR sical OR 'salmon calcitonin' OR salmocalcin OR salmofar OR salcatyn OR salcatonin OR salcat OR rulicalcin OR riostin OR quosten OR prontocalcin OR porostenina OR ostostabil OR ostosalm OR ostora OR osteovis OR osteobion OR osseocalcina | 45,766    |
| #60 | 'strontium ranelate' OR 'distrontium renelate' OR osseor OR protelos OR protos OR 'ranelic acid distrontium salt'                                                                                                                                                                                                                                                                                                                                                                                                                                                                                                                                                                                                                                | 2,630     |
| #59 | 'etidronic acid' OR etidronate OR etidronsaeure OR ferrofos OR ehdp OR 'acidum etidronicum' OR 'acido etidronico' OR 'acetodiphosphonic acid'                                                                                                                                                                                                                                                                                                                                                                                                                                                                                                                                                                                                    | 8,387     |
| #58 | clodronate OR 'acide clodronique' OR 'acido clodronico' OR 'clodronic acid' OR clodronsaeure OR bonefos OR ostac OR clasteon OR cl2mdp                                                                                                                                                                                                                                                                                                                                                                                                                                                                                                                                                                                                           | 6,317     |
| #57 | 'zoledronic acid' OR aclasta OR orazol OR zoledronateor OR zometa OR reclast                                                                                                                                                                                                                                                                                                                                                                                                                                                                                                                                                                                                                                                                     | 14,302    |
| #56 | 'acide risedronique' OR 'acido risedronico' OR 'acidum risedronicum' OR risedronate OR 'risedronic acid' OR actonel OR 'actonel with calcium'                                                                                                                                                                                                                                                                                                                                                                                                                                                                                                                                                                                                    | 7,382     |
| #55 | 'acid ibandronico' OR bondenza OR bondronat OR bonviva OR ibandronate OR 'ibandronic acid'                                                                                                                                                                                                                                                                                                                                                                                                                                                                                                                                                                                                                                                       | 4,966     |
| #54 | 'acide alendronique' OR 'acido alendronico' OR 'acidum alendronicum' OR 'alendronic acid' OR fosamax OR 'fosamax plus d' OR arendal OR binosto OR adronat OR alendros OR dronal OR elandor OR fosalan OR 'sodium alendronate hydrate' OR 'alendronate calcium alendronate sodium' OR 'alendronate sodium hydrate'                                                                                                                                                                                                                                                                                                                                                                                                                                | 15,440    |
| #53 | 'bisphosphonate*' OR 'diphosphonate*'                                                                                                                                                                                                                                                                                                                                                                                                                                                                                                                                                                                                                                                                                                            | 27,921    |
| #52 | 'etidronic acid'/de                                                                                                                                                                                                                                                                                                                                                                                                                                                                                                                                                                                                                                                                                                                              | 6,702     |
| #51 | 'clodronate'/de                                                                                                                                                                                                                                                                                                                                                                                                                                                                                                                                                                                                                                                                                                                                  | 6,032     |

| No. | Query                                                                                                                                                                              | Results   |
|-----|------------------------------------------------------------------------------------------------------------------------------------------------------------------------------------|-----------|
| #50 | 'zoledronic acid'/de                                                                                                                                                               | 14,038    |
| #49 | 'ibandronate'/de                                                                                                                                                                   | 4,870     |
| #48 | 'ibandronate'/de                                                                                                                                                                   | 4,870     |
| #47 | 'alendronate'/de                                                                                                                                                                   | 14,760    |
| #46 | 'diphosphonates'/de                                                                                                                                                                | 30,868    |
| #45 | #43 OR #44                                                                                                                                                                         | 138,949   |
| #44 | 'osteoporosis'/exp                                                                                                                                                                 | 115,797   |
| #43 | osteoporo*:ti,ab                                                                                                                                                                   | 99,176    |
| #42 | #1 OR #2 OR #3 OR #4 OR #7 OR #8 OR #9 OR #10 OR #12 OR #13 OR #14 OR #15 OR #16 OR #17 OR #19 OR #20 OR #21 OR #23 OR #24 OR #26 OR #27 OR #29 OR #30 OR #31 OR #38 OR #39 OR #41 | 124,716   |
| #41 | #6 AND #40                                                                                                                                                                         | 6,859     |
| #40 | oc:ti,ab                                                                                                                                                                           | 24,154    |
| #39 | 'osteocalcin':ti,ab                                                                                                                                                                | 19,648    |
| #38 | #36 AND #37                                                                                                                                                                        | 83,141    |
| #37 | bone OR 'bone turnover':ti,ab                                                                                                                                                      | 1,286,652 |
| #36 | #32 OR #33 OR #34 OR #35                                                                                                                                                           | 1,122,587 |
| #35 | biomarker*:ti,ab                                                                                                                                                                   | 282,957   |
| #34 | marker*:ti,ab                                                                                                                                                                      | 904,073   |
| #33 | 'biochemical marker*':ti,ab                                                                                                                                                        | 18,201    |
| #32 | 'biological marker*':ti,ab                                                                                                                                                         | 10,672    |
| #31 | 'bone metabolic marker*':ti,ab                                                                                                                                                     | 445       |
| #30 | 'bone turnover marker*':ti,ab                                                                                                                                                      | 4,461     |
| #29 | #6 AND #28                                                                                                                                                                         | 931       |
| #28 | tracp:ti,ab                                                                                                                                                                        | 951       |
| #27 | 'tartrate resistant acid phosphatase':ti,ab                                                                                                                                        | 5,011     |
| #26 | #6 AND #25                                                                                                                                                                         | 1,603     |
| #25 | bsp:ti,ab                                                                                                                                                                          | 3,998     |
| #24 | bone AND sialoprotein:ti,ab                                                                                                                                                        | 2,492     |
| #23 | #6 AND #22                                                                                                                                                                         | 1,601     |
| #22 | dpd:ti,ab                                                                                                                                                                          | 3,745     |
| #21 | 'deoxypyridinoline':ti,ab                                                                                                                                                          | 2,454     |
| #20 | 'pyridinoline':ti,ab                                                                                                                                                               | 1,798     |
| #19 | #6 AND #18                                                                                                                                                                         | 424       |
| #18 | pyd:ti,ab                                                                                                                                                                          | 860       |
| #17 | oxyproline OR 'hydroxyproline':ti,ab                                                                                                                                               | 14,827    |
| #16 | 'n-telopeptide' NEAR/5 collagen                                                                                                                                                    | 700       |
| #15 | 'c-telopeptide' NEAR/5 collagen                                                                                                                                                    | 948       |
| #14 | telopeptide NEAR/5 collagen                                                                                                                                                        | 4,954     |
| #13 | crosslaps:ti,ab                                                                                                                                                                    | 861       |
| #12 | #6 AND #11                                                                                                                                                                         | 7,476     |
| #11 | ntx OR ctx:ti,ab                                                                                                                                                                   | 18,198    |

| No. | Query                                                                                   | Results   |
|-----|-----------------------------------------------------------------------------------------|-----------|
| #10 | 'bone alkaline phosphatase*':ti,ab                                                      | 2,153     |
| #9  | 'bone source alkaline phosphatase*':ti,ab                                               | 1         |
| #8  | 'bone specific alkaline phosphatase':ti,ab                                              | 2,337     |
| #7  | #5 AND #6                                                                               | 3,230     |
| #6  | bone OR bones OR marker* OR biomarker* OR 'biological marker*' OR 'biochemical marker*' | 2,485,148 |
| #5  | bsap OR balp OR bap:ti,ab                                                               | 8,881     |
| #4  | collagen NEAR/5 propeptide                                                              | 1,300     |
| #3  | procollagen NEAR/5 peptide                                                              | 1,922     |
| #2  | procollagen NEAR/5 propeptide                                                           | 3,159     |
| #1  | picp OR pinp OR p1cp OR p1np:ti,ab                                                      | 4,010     |

*ti* title

*ab* abstract

### 3 Cochrane Library

From inception to 2018/3/20

Including subdatabases:

Cochrane Central Register of Controlled Trials 1975

Cochrane Database of Systematic Reviews(CDSR) 123

Database of Abstracts of Reviews of Effect(DARE) 15

Health Technology Assessment Database 5

NHS Economic Evaluation Database 3

Search items

| ID  | Search                                                                   | Hits   |
|-----|--------------------------------------------------------------------------|--------|
| #1  | P1NP or PICP or PINP or PICP                                             | 679    |
| #2  | procollagen near/3 propeptide                                            | 106    |
| #3  | procollagen near/3 peptide                                               | 201    |
| #4  | collagen near/3 propeptide                                               | 45     |
| #5  | bsap or balp or bap                                                      | 507    |
| #6  | bone or bones or biomarker* or biological marker* or biochemical marker* | 69,092 |
| #7  | #5 and #6                                                                | 398    |
| #8  | bone alkaline phosphatase*                                               | 2,225  |
| #9  | bone specific alkaline phosphatase*                                      | 815    |
| #10 | bone source alkaline phosphatase*                                        | 117    |
| #11 | NTX or CTX                                                               | 1,877  |
| #12 | #11 and #6                                                               | 1,179  |
| #13 | crosslaps                                                                | 100    |
| #14 | telopeptide near/3 collagen                                              | 333    |
| #15 | 'c-telopeptide' near/3 collagen                                          | 89     |
| #16 | 'n-telopeptide' near/3 collagen                                          | 63     |
| #17 | oxyproline or hydroxyproline                                             | 586    |

| ID  | Search                                                                                                                                                                                                                                                                                    | Hits  |
|-----|-------------------------------------------------------------------------------------------------------------------------------------------------------------------------------------------------------------------------------------------------------------------------------------------|-------|
| #18 | PYD                                                                                                                                                                                                                                                                                       | 55    |
| #19 | #18 and #6                                                                                                                                                                                                                                                                                | 49    |
| #20 | pyridinoline                                                                                                                                                                                                                                                                              | 232   |
| #21 | DPD                                                                                                                                                                                                                                                                                       | 250   |
| #22 | #21 and #6                                                                                                                                                                                                                                                                                | 161   |
| #23 | deoxypyridinoline                                                                                                                                                                                                                                                                         | 453   |
| #24 | sialoprotein                                                                                                                                                                                                                                                                              | 15    |
| #25 | BSP                                                                                                                                                                                                                                                                                       | 86    |
| #26 | #25 and #6                                                                                                                                                                                                                                                                                | 19    |
| #27 | tartrate resistant acid phosphatase                                                                                                                                                                                                                                                       | 163   |
| #28 | TRACP                                                                                                                                                                                                                                                                                     | 39    |
| #29 | #28 and #6                                                                                                                                                                                                                                                                                | 37    |
| #30 | osteocalcin                                                                                                                                                                                                                                                                               | 1,789 |
| #31 | bone turnover marker*                                                                                                                                                                                                                                                                     | 2,022 |
| #32 | bone metabolic marker*                                                                                                                                                                                                                                                                    | 608   |
| #33 | ('biological marker*' or 'biochemical marker' or 'biomarker*') near/2 bone*                                                                                                                                                                                                               | 1,104 |
| #34 | #1 or #2 or #3 or #4 or #7 or #8 or #9 or #10 or #12 or #13 or #14 or #15 or #16 or #17 or #19 or #20 or #22 or #23 or #24 or #26 or #27 or #29 or #30 or #31 or #32 or #33                                                                                                               | 5,759 |
| #35 | MeSH descriptor: [Osteoporosis] explode all trees                                                                                                                                                                                                                                         | 3,614 |
| #36 | osteoporo*                                                                                                                                                                                                                                                                                | 8,729 |
| #37 | #35 or #36                                                                                                                                                                                                                                                                                | 8,729 |
| #38 | MeSH descriptor: [Diphosphonates] this term only                                                                                                                                                                                                                                          | 1,117 |
| #39 | MeSH descriptor: [Alendronate] this term only                                                                                                                                                                                                                                             | 649   |
| #40 | MeSH descriptor: [Etidronic Acid] this term only                                                                                                                                                                                                                                          | 433   |
| #41 | MeSH descriptor: [Clodronic Acid] this term only                                                                                                                                                                                                                                          | 185   |
| #42 | bisphosphonate* or diphosphonate*                                                                                                                                                                                                                                                         | 2,408 |
| #43 | fosamax or "fosamax plus d " or "alendronic acid" or arendal or binosto or adronat or alendros or dronal or elandor or fosalan or "sodium alendronate hydrate" or "alendronate calcium alendronate sodium" or "alendronate sodium hydrate" or "acido alendronico" or "acide alendronique" | 555   |
| #44 | 'acid ibandronico' or bondenza or bondronat or bonviva or ibandronate or 'ibandronic acid'                                                                                                                                                                                                | 382   |
| #45 | 'acide risedronique' or cido risedronico' or 'cidum risedronicum' or risedronate or 'isedronic acid' or actonel or 'ctonel with calcium'                                                                                                                                                  | 582   |
| #46 | 'zoledronic acid' or aclasta or orazol or zoledronateor or zometa or reclast                                                                                                                                                                                                              | 1,009 |
| #47 | clodronate or 'acide clodronique' or 'acido clodronico' or 'clodronic acid' or clodronsaeure or bonefos or ostac or clasteon or cl2mdp                                                                                                                                                    | 382   |
| #48 | 'etidronic acid' or etidronate or etidronsaeure or ferrofos or ehdp or 'acidum etidronicum' or 'acido etidronico' or 'acetodiphosphonic acid'                                                                                                                                             | 651   |
| #49 | 'strontium ranelate' or 'distrontium renelate' or osseor or protelos or protos or 'ranelic acid distrontium salt'                                                                                                                                                                         | 183   |
| #50 | calcitonin or astronin or biocalcin or bionocalcin or cadens or calciben or calcihexal or                                                                                                                                                                                                 | 1,557 |

| ID  | Search                                                                                                                                                                                                                                                                                                                                                                                                                                                                                                                                                                                                                                                 | Hits    |
|-----|--------------------------------------------------------------------------------------------------------------------------------------------------------------------------------------------------------------------------------------------------------------------------------------------------------------------------------------------------------------------------------------------------------------------------------------------------------------------------------------------------------------------------------------------------------------------------------------------------------------------------------------------------------|---------|
|     | calcimar or calcimonta or calcinil or calcioton or 'calcitonin salmon' or 'calcitonin vom lachs' or 'calcitonin, salmar' or calcitonina or calcitoran or calco or calogen or calsynar or caltine or casalm or catonin or cibacalcin* or citonina or eptacalcin or ipocalcin or kalsimin or karil or miacalcin or oseototal or ucecal or tonocalcin or thyrocalcitonin or steocin or staporos or stalcin or sical or 'salmon calcitonin' or salmocalcin or salmofar or salcatyn or salcatonin or salcat or rulicalcin or riostin or quosten or prontocalcin or porostenina or ostostabil or ostosalm or ostora or osteovis or osteobion or osseocalcina |         |
| #51 | MeSH descriptor: [Estrogen Replacement Therapy] this term only                                                                                                                                                                                                                                                                                                                                                                                                                                                                                                                                                                                         | 2,151   |
| #52 | MeSH descriptor: [Hormone Replacement Therapy] this term only                                                                                                                                                                                                                                                                                                                                                                                                                                                                                                                                                                                          | 903     |
| #53 | 'estrogen replacement therapy' or 'hormone replacement therapy' or 'estrogen progesterone hormone therapy'                                                                                                                                                                                                                                                                                                                                                                                                                                                                                                                                             | 5,894   |
| #54 | MeSH descriptor: [Raloxifene Hydrochloride] this term only                                                                                                                                                                                                                                                                                                                                                                                                                                                                                                                                                                                             | 441     |
| #55 | raloxifene or evista or hsdh or pharoxifene or ccris or raloxifeno or raloxifenum                                                                                                                                                                                                                                                                                                                                                                                                                                                                                                                                                                      | 854     |
| #56 | MeSH descriptor: [Denosumab] this term only                                                                                                                                                                                                                                                                                                                                                                                                                                                                                                                                                                                                            | 131     |
| #57 | denosumab or prolia or xgeva                                                                                                                                                                                                                                                                                                                                                                                                                                                                                                                                                                                                                           | 552     |
| #58 | MeSH descriptor: [Teriparatide] this term only                                                                                                                                                                                                                                                                                                                                                                                                                                                                                                                                                                                                         | 208     |
| #59 | teriparatide or parathar or 'human pth (1-34) ' or '1-34-parathormone human' or forteo or 'hpth 1-34' or hsdh or 'parathyroid hormone peptide (1-34) ' or 'human parathyroid hormone (1-34) ' or 'human parathormone (1-34) ' or teriparatida or teriparatidum                                                                                                                                                                                                                                                                                                                                                                                         | 438     |
| #60 | treatment* or treat or treated or treats or therap*                                                                                                                                                                                                                                                                                                                                                                                                                                                                                                                                                                                                    | 760,984 |
| #61 | #38 or #39 or #40 or #41 or #42 or #43 or #44 or #45 or #46 or #47 or #48 or #48 or #50 or #51 or #52 or #53 or #54 or #55 or #56 or #57 or #58 or #59 or #60                                                                                                                                                                                                                                                                                                                                                                                                                                                                                          | 761,812 |
| #62 | #34 and #37 and #61                                                                                                                                                                                                                                                                                                                                                                                                                                                                                                                                                                                                                                    | 2,121   |

#### 4 Conference Proceedings Citation Index – Science & Science Citation Index Expanded (Web of Science)

Search library from 1900-2018

Search data 2018/3/22

Search research 6746

Search items

| Set  | Results | History                                                                                               |
|------|---------|-------------------------------------------------------------------------------------------------------|
| # 42 | 6746    | #41 AND #25 AND #24                                                                                   |
| # 41 | 6023219 | #40 OR #39 OR #38 OR #37 OR #36 OR #35 OR #34 OR #33 OR #32 OR #31 OR #30 OR #29 OR #28 OR #27 OR #26 |
| # 40 | 5988734 | TS=(treatment* OR treat OR treated OR treats OR therap*)                                              |
| # 39 | 4234    | TS=(raloxifene OR evista OR hsdh OR pharoxifene OR ccris OR raloxifeno OR raloxifenum)                |

| Set  | Results | History                                                                                                                                                                                                                                                                                                                                                                                                                                                                                                                                                                                                                                                                                                                                               |
|------|---------|-------------------------------------------------------------------------------------------------------------------------------------------------------------------------------------------------------------------------------------------------------------------------------------------------------------------------------------------------------------------------------------------------------------------------------------------------------------------------------------------------------------------------------------------------------------------------------------------------------------------------------------------------------------------------------------------------------------------------------------------------------|
| # 38 | 3559    | TS=(teriparatide OR parathar OR (human pth (1-34)) OR (1-34-parathormone human) OR forteo OR (hpth 1-34) OR hsdh OR (parathyroid hormone peptide (1-34)) OR (human parathyroid hormone (1-34)) OR (human parathormone (1-34)) OR teriparatida OR teriparatidum)                                                                                                                                                                                                                                                                                                                                                                                                                                                                                       |
| # 37 | 2622    | TS=(denosumab OR prolia OR xgeva)                                                                                                                                                                                                                                                                                                                                                                                                                                                                                                                                                                                                                                                                                                                     |
| # 36 | 24269   | TS=("estrogen replacement therapy" OR "hormone replacement therapy" OR "estrogen/progesterone hormone therapy" OR "estrogen therapy")                                                                                                                                                                                                                                                                                                                                                                                                                                                                                                                                                                                                                 |
| # 35 | 25484   | TS=(calcitonin OR astronin OR biocalcin OR bionocalcin OR cadens OR calciben OR calcihexal OR calcimar OR calcimonta OR calcinil OR calcioton OR "calcitonin salmon" OR "calcitonin vom lachs" OR 'calcitonin, salmar' OR calcitonina OR calcitoran OR calco OR calogen OR calsynar OR caltine OR casalm OR catonin OR cibacalcin* OR citonina OR eptacalcin OR ipocalcin OR kalsimin OR karil OR miacalcin OR oseototal OR ucecal OR tonocalcin OR thyrocalcitonin OR steocin OR staporos OR stalcin OR sical OR "salmon calcitonin" OR salmocalcin OR salmofar OR salcatyn OR salcatonin OR salcat OR rulicalcin OR riostin OR quosten OR prontocalcin OR porostenina OR ostostabil OR ostosalm OR ostora OR osteovis OR osteobion OR osseocalcina) |
| # 34 | 1462    | TS=("strontium ranelate" OR "distrontium renelate" OR osseor OR protelos OR protos OR "ranelic acid distrontium salt")                                                                                                                                                                                                                                                                                                                                                                                                                                                                                                                                                                                                                                |
| # 33 | 2222    | TS=("etidronic acid" OR etidronate OR etidronsaeure OR ferrofos OR ehdp OR "acidum etidronicum" OR "acido etidronico" OR "acetodiphosphonic acid")                                                                                                                                                                                                                                                                                                                                                                                                                                                                                                                                                                                                    |
| # 32 | 2675    | TS=(clodronate OR "acide clodronique" OR "acido clodronico" OR "clodronic acid" OR clodronsaeure OR bonefos OR ostac OR clasteon OR cl2mdp)                                                                                                                                                                                                                                                                                                                                                                                                                                                                                                                                                                                                           |
| # 31 | 7021    | TS=("zoledronic acid" OR aclasta OR orazol OR zoledronateor OR zometa OR reclast)                                                                                                                                                                                                                                                                                                                                                                                                                                                                                                                                                                                                                                                                     |
| # 30 | 2978    | TS=("acide risedronique" OR "acido risedronico" OR "acidum risedronicum" OR risedronate OR "risedronic acid" OR actonel OR "actonel with calcium")                                                                                                                                                                                                                                                                                                                                                                                                                                                                                                                                                                                                    |
| # 29 | 1916    | TS=("acid ibandronico" OR bondenza OR bondronat OR bonviva OR ibandronate OR "ibandronic acid")                                                                                                                                                                                                                                                                                                                                                                                                                                                                                                                                                                                                                                                       |
| # 28 | 270     | TS=("acide alendronique" OR "acido alendronico" OR "acidum alendronicum" OR "alendronic acid" OR fosamax OR "fosamax plus d" OR arendal OR binosto OR adronat OR alendros OR dronal OR elandor OR fosalan OR "sodium alendronate hydrate" OR "alendronate calcium alendronate sodium" OR "alendronate sodium hydrate")                                                                                                                                                                                                                                                                                                                                                                                                                                |
| # 27 | 17514   | TS=(alendronate OR ibandronate OR ibandronate OR zoledronic acid OR clodronate OR etidronic acid)                                                                                                                                                                                                                                                                                                                                                                                                                                                                                                                                                                                                                                                     |
| # 26 | 23094   | TS=(diphosphonate* OR bisphosphonate*)                                                                                                                                                                                                                                                                                                                                                                                                                                                                                                                                                                                                                                                                                                                |
| # 23 | 13983   | TS=((("biological marker*" OR "biochemical marker*" OR "biomarker*" OR "marker*") NEAR/2 (bone OR bones OR "bone turnover"))                                                                                                                                                                                                                                                                                                                                                                                                                                                                                                                                                                                                                          |
| # 22 | 9154    | TS=(bone turnover marker* OR "bone biological marker*" OR "bone biochemical marker*")                                                                                                                                                                                                                                                                                                                                                                                                                                                                                                                                                                                                                                                                 |
| # 21 | 486     | TS=(TRACP) AND #8                                                                                                                                                                                                                                                                                                                                                                                                                                                                                                                                                                                                                                                                                                                                     |
| # 20 | 4023    | TS=(tartrate resistant acid phosphatase)                                                                                                                                                                                                                                                                                                                                                                                                                                                                                                                                                                                                                                                                                                              |
| # 19 | 1387    | TS=(BSP) AND #8                                                                                                                                                                                                                                                                                                                                                                                                                                                                                                                                                                                                                                                                                                                                       |

| Set  | Results | History                                                                                      |
|------|---------|----------------------------------------------------------------------------------------------|
| # 18 | 10755   | TS=(oxyproline OR hydroxyproline)                                                            |
| # 17 | 1102    | #16 AND #8                                                                                   |
| # 16 | 5220    | TS=("PYD" OR "DPD")                                                                          |
| # 15 | 3109    | TS=(pyridinoline OR deoxypyridinoline)                                                       |
| # 14 | 2884    | TS=(*telopeptide NEAR/3 collagen)                                                            |
| # 13 | 525     | TS=(crosslaps)                                                                               |
| # 12 | 3692    | #11 AND #8                                                                                   |
| # 11 | 11977   | TS=(CTX OR NTX)                                                                              |
| # 10 | 2183    | #9 AND #8                                                                                    |
| # 9  | 9888    | TS=(BSAP OR BALP OR BAP)                                                                     |
| # 8  | 1613180 | TS=(bone OR bones OR marker* OR biomarker* OR "biological marker*" OR "biochemical marker*") |
| # 7  | 21035   | TS=(bone alkaline phosphatase*)                                                              |
| # 6  | 4552    | TS=(bone specific alkaline phosphatase)                                                      |
| # 5  | 686     | TS=(bone source alkaline phosphatase*)                                                       |
| # 4  | 697     | TS=(collagen near/3 propeptide)                                                              |
| # 3  | 1108    | TS=(procollagen near/3 peptide)                                                              |
| # 2  | 1586    | TS=(procollagen near/3 propeptide)                                                           |
| # 1  | 1521    | TS=(PICP OR PINP)                                                                            |
