# Supplementary material
Source: MDPI journal article supplement (https://www.mdpi.com/2076-3417/10/3/832)
Supplement: s1 [file s1]

## Supplementary Tables

### Contents

|                   |                                                                                                          |          |
|-------------------|----------------------------------------------------------------------------------------------------------|----------|
| <i>Table S1</i>   | <i>Characteristics of the outcomes in eligible studies.....</i>                                          | <i>2</i> |
| <i>Table S2</i>   | <i>Summary correlation coefficients of subgroup analyses by group of bone site.....</i>                  | <i>5</i> |
| <i>Table S3</i>   | <i>Summary correlations of subgroup analyses by group of intervention.....</i>                           | <i>6</i> |
| <i>Table S4</i>   | <i>Summary correlations of subgroup analyses by group of the time duration of BTMs measurements.....</i> | <i>7</i> |
| <i>Table S5</i>   | <i>Summary correlations of subgroup analyses by group of the time duration of BMD measurements.....</i>  | <i>8</i> |
| <i>References</i> | <i>.....</i>                                                                                             | <i>9</i> |

**Table S1** Characteristics of the outcomes in eligible studies

| Study             | Bone markers                                       | BTMs assessments                     | BTMs time point (month) | Fasting | BMD site                                                   | BMD measurements | BMD time point (month)      |
|-------------------|----------------------------------------------------|--------------------------------------|-------------------------|---------|------------------------------------------------------------|------------------|-----------------------------|
| Greenspan 1998[1] | U-NTX/Cre; DPD/Cr<br>OC; Bone ALP                  | ELISA<br>NR                          | Baseline, 6             | Yes     | TH; FN; TR; InterTR; Spine (PA spine; lateral spine); TB   | DXA              | Baseline, 30                |
| Garnero 1999[2]   | Bone ALP                                           | NR                                   | Baseline, 3, 6, 24      | Yes     | LS                                                         | DXA              | Baseline, 24                |
| Watts2001[3]      | Bone ALP                                           | EIA                                  | Baseline, 3, 6, 12      | Yes     | LS(L1-L4); FN; TR; TB                                      | DXA              | Baseline, 3,6,12,18, 24, 36 |
| Drake 2003[4]     | Bone ALP, U-NTX                                    | NR                                   | baseline; 3, 6, 12, 18  | Yes     | LS(L1-L4); FN; TB;                                         | DXA              | Baseline,6,12,18,24         |
| Eastell2003[5]    | CTX/Cre; NTX/Cre                                   | Automated analyser                   | Baseline, 3, 6          | Yes     | LS(L1-L4); FN;                                             | DXA              | baseline                    |
| Ravn 2003[6]      | U-CTX/Cre;U-NTX<br>Total OC                        | ELISA<br>RIA; ELISA                  | Baseline, 6, 12, 48     | Yes     | Spine; Hip; total body; wrist                              | DXA              | Baseline,48                 |
| Greenspan 2005[7] | Bone ALP; Intact OC<br>U-NTX                       | NR<br>NR<br>ELISA                    | Baseline, 6             | Yes     | Hip (TH; FN; TR; interTR); Spine (PA spine; lateral spine) | DXA              | Baseline,36                 |
| Neonen 2005[8]    | S-CTX; bone ALP; PINP<br>Total OC; TRACP-5b<br>DPD | Commercial IA<br>In-house IA<br>HPLC | Baseline, 3, 6, 12      | Yes     | LS                                                         | DXA              | Baseline,12                 |

(Continued) **Table S1** Characteristics of the outcomes in eligible studies

| <b>Study</b>       | <b>Bone markers</b> | <b>BTMs assessments</b>   | <b>BTMs time point (month)</b> | <b>Fasting</b> | <b>BMD site</b>   | <b>BMD measurements</b> | <b>BMD time point (month)</b> |
|--------------------|---------------------|---------------------------|--------------------------------|----------------|-------------------|-------------------------|-------------------------------|
| Iwamoto 2005[9]    | U-NTX/Cre           | NR                        | Baseline, 3, 6, 12             | Yes            | LS                | DXA                     | Baseline,12                   |
| Takada2012 [10]    | S-NTX               | NR                        | 0, 6                           | Yes            | FN; InterTR       | DXA                     | 0, 12                         |
| Iikuni2012 [11]    | U-NTX               | NR                        | Baseline,3                     | Yes            | LS                | DXA                     | Baseline, 12                  |
| Majima2008 [12]    | Bone ALP            | EIA                       | Baseline,3,6,12                | Yes            | LS(L2-L4); FN; TR | DXA                     | 0, 6, 12                      |
|                    | S-NTX               | ELISA                     |                                |                |                   |                         |                               |
| Lu2017 [13]        | OCN                 | IA                        | Baseline,2,3,4,7               | Yes            | LS                | DXA                     | Baseline, 2,3, 4,7            |
| Eastell2011 [14]   | S-CTX               | ELISA                     | Baseline,6,12,24,36            | Yes            | LS; TH            | DXA                     | Baseline, 6, 12, 24, 36       |
|                    | PINP                | RIA                       |                                |                |                   |                         |                               |
|                    | TRACP-5b            | ELISA                     |                                |                |                   |                         |                               |
|                    | Bone ALP            | IA                        |                                |                |                   |                         |                               |
| Chen2005 [15]      | Bone ALP            | Two-site IRMA             | Baseline,3,6,12                | NR             | LS; FN            | DXA                     | Baseline,12,18                |
|                    | PICP; PINP          | RIA                       |                                |                |                   |                         |                               |
|                    | NTX/Cre             | ELISA                     |                                |                |                   |                         |                               |
|                    | DPD/Cre             | Enzyme IA                 |                                |                |                   |                         |                               |
| Tsujimoto2011 [16] | PINP                | RIA                       | Baseline,3,6,12                | Yes            | LS; FN; TH        | DXA                     | Baseline,3,6,12               |
|                    | S-CTX               | ELISA                     |                                |                |                   |                         |                               |
|                    | Bone ALP            | Ostase assay              |                                |                |                   |                         |                               |
| Delmas2000[17]     | OC; bone ALP        | IRMA                      | Baseline,3,6                   | Yes            | LS                | DXA                     | Baseline,6,12,24,             |
|                    | S/U-CTX             | ELISA                     |                                |                |                   |                         |                               |
| Riis1995 [18]      | pBGP                | RIA                       | Baseline,3,6,12,24             | Yes            | Spine             | DXA                     | Baseline,24                   |
|                    | S-ALP               | IA                        |                                |                |                   |                         |                               |
|                    | U-HPR/Cre           | Spectrophotometric method |                                |                |                   |                         |                               |

(Continued) **Table S1** Characteristics of the outcomes in eligible studies

| Study          | Bone markers        | BTMs assessments | BTMs time point (month) | Fasting | BMD site          | BMD measurements | BMD time point (month) |
|----------------|---------------------|------------------|-------------------------|---------|-------------------|------------------|------------------------|
| Okabe2004 [19] | S- $\beta$ -CTX     | ECL              | Baseline,1,3,6          | Yes     | LS(L2-L4)         | DXA              | Baseline,6             |
|                | S-ICTP              | RIA              |                         |         |                   |                  |                        |
|                | DPD/Cre             | HPLC             |                         |         |                   |                  |                        |
| Zhan1999 [20]  | PYD/Cre;<br>DPD/Cre | HPLC             | Baseline,6,12,24,36     | NR      | TB; LS(L2-L4); FN | DXA              | Baseline,6,12,24,36    |
| Chen1996 [21]  | S-ALP               | IA               | Baseline,3,6,12         | Yes     | LS                | DXA              | Baseline,12            |
|                | PYD/Cre;<br>DPD/Cre | HPLC             |                         |         |                   |                  |                        |
|                | OC                  | RIA              |                         |         |                   |                  |                        |
| Kim2005 [22]   | U-NTX               | ELISA            | Baseline,3,6,12         | Yes     | LS(L1-L4); FN     | DXA              | Baseline,12            |
|                | OC                  | RIA              |                         |         |                   |                  |                        |

ALP alkaline phosphatase, BGP bone  $\gamma$ -hydroxy glutamic acid protein, BMD bone mineral density (g/cm<sup>2</sup>), BSP bone sialoprotein, CLIA chemiluminescence analysis, Cre corrected for creatinine, CTX C-terminal crosslinking telopeptide of type I collagen, DPA dual photon absorptiometry, DPD deoxypyridinoline, DXA dual energy X-ray absorptiometry, ECL electrochemiluminescence, ELISA enzyme-linked immunosorbent assay, FN femoral neck, HPLC high-performance liquid chromatography, HYP hydroxyproline, IA immunoassay, ICTP C-terminal crosslinking telopeptide of type I collagen generated by MMPs, InterTR intertrochanter, IRMA immunoradiometric assay, LS lumbar spine, NR not report, NTX N-terminal crosslinking telopeptide of type I collagen, OC osteocalcin, PICP procollagen type I C propeptide, PINP procollagen type I N propeptide, p~ plasma, PYD pyridinoline, RIA radioimmunoassay, t~ total, TB total body, TH total hip, TR trochanter, TRACP-5b tartrate-resistant acid phosphatase 5b, S serum, U urine, wk week

**Table S2** Summary correlation coefficients of subgroup analyses by group of bone site

| <b>COR</b>           | <b>Heterogeneity</b>                          | <b>Included studies</b>                        | <b>Effects model</b> | <b>BTMs</b> | <b>Bone site</b> |
|----------------------|-----------------------------------------------|------------------------------------------------|----------------------|-------------|------------------|
| -0.26 [-0.37; -0.14] | $I^2 = 0\%$ , $\tau^2 = 0$ , $p = 0.63$       | Greenspan2005a; Watts2001a                     | Fixed                | Bone ALP    | FN               |
| -0.26 [-0.34; -0.18] | $I^2 = 4\%$ , $\tau^2 = 0.0003$ , $p = 0.37$  | Eastell2011; Tsujimoto2011a; Watts2001(b,c)    | Fixed                | Bone ALP    | LS               |
| -0.23 [-0.36; -0.09] | not applicable                                | Watts2001a                                     | Fixed                | Bone ALP    | TB               |
| -0.29 [-0.39; -0.19] | $I^2 = 14\%$ , $\tau^2 = 0.0017$ , $p = 0.31$ | Greenspan2005(b,d); Tsujimoto2011b             | Fixed                | Bone ALP    | TH               |
| -0.26 [-0.33; -0.18] | $I^2 = 0\%$ , $\tau^2 = 0$ , $p = 0.83$       | Greenspan2005(e,h); Majima2008; Watts2001(b,c) | Fixed                | Bone ALP    | TR               |
| -0.30 [-0.48; -0.10] | not applicable                                | Kim2005                                        | Fixed                | OC          | FN               |
| -0.27 [-0.41; -0.12] | $I^2 = 28\%$ , $\tau^2 = 0.0055$ , $p = 0.24$ | Ravn2003a; Lu2017                              | Fixed                | OC          | LS               |
| -0.39 [-0.53; -0.22] | $I^2 = 47\%$ , $\tau^2 = 0.0157$ , $p = 0.17$ | Ravn2003(c,d)                                  | Fixed                | OC          | TB               |
| -0.36 [-0.49; -0.23] | $I^2 = 0\%$ , $\tau^2 = 0$ , $p = 0.80$       | Green1998a; Ravn2003(e,f)                      | Fixed                | OC          | TH               |
| -0.32 [-0.53; -0.07] | not applicable                                | Greenspan1998b                                 | Fixed                | OC          | TR               |
| -0.20 [-0.37; -0.02] | not applicable                                | Tsujimoto2011a                                 | Fixed                | S-CTX       | FN               |
| -0.24 [-0.39; -0.08] | $I^2 = 0\%$ , $\tau^2 = 0$ , $p = 1.00$       | Nenonen2005; Eastell2011a                      | Fixed                | S-CTX       | LS               |
| -0.33 [-0.46; -0.20] | $I^2 = 46\%$ , $\tau^2 = 0.0097$ , $p = 0.17$ | Eastell2011b; Tsujimoto2011b                   | Fixed                | S-CTX       | TH               |
| -0.32 [-0.48; -0.14] | $I^2 = 0\%$ , $\tau^2 = 0$ , $p = 0.58$       | Kim2005a; Greenspan1998c                       | Fixed                | U-NTX       | FN               |
| -0.34 [-0.37; -0.31] | $I^2 = 0\%$ , $\tau^2 = 0$ , $p = 0.59$       | Iwamoto2005(a,b,c); Kim2005b; Iikuni2012       | Fixed                | U-NTX       | LS               |
| -0.44 [-0.58; -0.29] | $I^2 = 43\%$ , $\tau^2 = 0.0136$ , $p = 0.18$ | Greenspan1998d; Ravn2003c                      | Fixed                | U-NTX       | TB               |
| -0.39 [-0.50; -0.26] | $I^2 = 0\%$ , $\tau^2 = 0$ , $p = 0.53$       | Greenspan2005a; Greenspan1998e; Ravn2003d      | Fixed                | U-NTX       | TH               |
| -0.35 [-0.48; -0.20] | $I^2 = 0\%$ , $\tau^2 = 0$ , $p = 0.91$       | Greenspan2005b; Greenspan1998f                 | Fixed                | U-NTX       | TR               |

ALP alkaline phosphatase, CI confidence interval, DPD deoxypyridinoline, FN femoral neck, LS lumbar spine, OC osteocalcin, S-CTX serum C-terminal crosslinking telopeptide of type I collagen, TB Total body, TH Total hip, TR Trochanter, U-NTX urine N-terminal crosslinking telopeptide of type I collagen

**Table S3** Summary correlations of subgroup analyses by group of intervention

| <b>COR (95%CI)</b>   | <b>Heterogeneity</b>                        | <b>Included studies</b>                                   | <b>Effects model</b> | <b>BTMs</b> | <b>Intervention</b> |
|----------------------|---------------------------------------------|-----------------------------------------------------------|----------------------|-------------|---------------------|
| -0.27 [-0.32; -0.21] | $I^2 = 0\%$ , $\tau^2 = 0$ , $p = 0.48$     | Greenspan2005(b,e); Watts2001(a,b,c,d,e,f)                | Fixed                | Bone ALP    | ALN10               |
| -0.30 [-0.47; -0.10] | not applicable                              | Greenspan2005a                                            | Fixed                | Bone ALP    | ALN10+HRT           |
| -0.26 [-0.46; -0.03] | not applicable                              | Eastell2011                                               | Fixed                | Bone ALP    | DMAB                |
| -0.29 [-0.42; -0.15] | $I^2 = 0\%$ , $\tau^2 = 0$ , $p = 0.62$     | Greenspan2005(d,h)                                        | Fixed                | Bone ALP    | HRT                 |
| -0.28 [-0.48; -0.05] | not applicable                              | Majima2008                                                | Fixed                | Bone ALP    | RLX                 |
| -0.21 [-0.33; -0.09] | $I^2 = 0\%$ , $\tau^2 = 0$ , $p = 0.81$     | Tsujimoto2011(a,b)                                        | Fixed                | Bone ALP    | TPTD                |
| -0.37 [-0.45; -0.28] | $I^2 = 0\%$ , $\tau^2 = 0$ , $p = 0.86$     | Ravn2003(a,c,d,e,f); Green1998(a,b)                       | Fixed                | OC          | ALN5                |
| -0.20 [-0.38; -0.01] | not applicable                              | Lu2017                                                    | Fixed                | OC          | CCT                 |
| -0.30 [-0.48; -0.10] | not applicable                              | Kim2005                                                   | Fixed                | OC          | HRT                 |
| -0.44 [-0.57; -0.31] | $I^2 = 0\%$ , $\tau^2 = 0$ , $p = 0.71$     | Eastell2011(a,b)                                          | Random               | PINP        | DMAB                |
| 0.31 [0.19; 0.42]    | $I^2 = 0\%$ , $\tau^2 = 0$ , $p = 0.38$     | Tsujimoto2011; Chen2005                                   | Random               | PINP        | TPTD                |
| -0.24 [-0.44; -0.01] | Not applicable                              | Nenonen2005                                               | Fixed                | S-CTX       | ALN5                |
| -0.34 [-0.48; -0.19] | $I^2 = 46\%$ , $\tau^2 = 0.0120$ , $P=0.17$ | Eastell2011(a,b)                                          | Fixed                | S-CTX       | DMAB                |
| -0.23 [-0.35; -0.10] | $I^2 = 0\%$ , $\tau^2 = 0$ , $p = 0.64$     | Tsujimoto2011(a,b)                                        | Fixed                | S-CTX       | TPTD                |
| -0.35 [-0.46; -0.23] | $I^2 = 0\%$ , $\tau^2 = 0$ , $p = 0.97$     | Kim2005a; Greenspan2005(a,b)                              | Fixed                | U-NTX       | ALN10               |
| -0.35 [-0.42; -0.28] | $I^2 = 0\%$ , $\tau^2 = 0$ , $p = 0.44$     | Greenspan1998(c,d,e,f); Iwamoto2005(a,b,c); Ravn2003(c,d) | Fixed                | U-NTX       | ALN5                |
| -0.29 [-0.47; -0.08] | Not applicable                              | Kim2005b                                                  | Fixed                | U-NTX       | HRT                 |
| -0.35 [-0.38; -0.31] | Not applicable                              | Iikuni2012                                                | Fixed                | U-NTX       | RLX                 |

ALN Alendronate, ALN10 10 mg/d ALN, ALN5 5mg/d ALN, ALP alkaline phosphatase, CCT calcitonin, CI confidence interval, DMAB Denosumab, DPD deoxypyridinoline, FN femoral neck, LS lumbar spine, OC osteocalcin, RLX Raloxifene, S-CTX serum C-terminal crosslinking telopeptide of type I collagen, TB Total body, TH Total hip, TPTD Teriparatide, TR Trochanter, U-NTX urine N-terminal crosslinking telopeptide of type I collagen

**Table S4** Summary correlations of subgroup analyses by group of the time duration of BTMs measurements

| <b>COR (95%CI)</b>   | <b>Heterogeneity</b>                          | <b>Included studies</b>                                                           | <b>Effects model</b> | <b>Bone markers</b> | <b>Time point of BTMs measurements (month)</b> |
|----------------------|-----------------------------------------------|-----------------------------------------------------------------------------------|----------------------|---------------------|------------------------------------------------|
| 0.32 [0.22; 0.40]    | $I^2 = 39\%$ , $\tau^2 = 0.0053$ , $p = 0.19$ | Chen2005a, Tsujimoto2011(a,b)                                                     | Fixed                | Bone ALP            | 0                                              |
| -0.28 [-0.48; -0.05] | not applicable                                | Majima2008                                                                        | Fixed                | Bone ALP            | 3                                              |
| -0.26 [-0.31; -0.22] | $I^2 = 0\%$ , $\tau^2 = 0$ , $p = 0.86$       | Eastell2011; Greenspan2005(a,b,d,e,h); Tsujimoto2011(a,b); Watts2001(a,b,c,d,e,f) | Fixed                | Bone ALP            | 6                                              |
| 0.33 [0.13; 0.50]    | Not applicable                                | Kim2005a                                                                          | Fixed                | OC                  | 0                                              |
| -0.20 [-0.38; -0.01] | not applicable                                | Lu2017                                                                            | Fixed                | OC                  | 4.7                                            |
| -0.32 [-0.41; -0.23] | $I^2 = 0\%$ , $\tau^2 = 0$ , $p = 0.99$       | Ravn2003(a,c,e); Ravn2003(c,e); Kim2005                                           | Fixed                | OC                  | 6                                              |
| -0.46 [-0.59; -0.30] | $I^2 = 0\%$ , $\tau^2 = 0$ , $p = 0.64$       | Ravn2003(d,f)                                                                     | Fixed                | OC                  | 12                                             |
| 0.42 [0.34; 0.50]    | $I^2 = 0\%$ , $\tau^2 = 0$ , $p = 0.40$       | Chen2005c; Tsujimoto2011(c,d)                                                     | Fixed                | PINP                | 0                                              |
| 0.36 [0.20; 0.50]    | Not applicable                                | Chen2005b                                                                         | Fixed                | PICP                | 0                                              |
| 0.39 [0.27; 0.49]    | $I^2 = 0\%$ , $\tau^2 = 0$ , $p = 0.66$       | Tsujimoto2011(e,f)                                                                | Fixed                | SCTX                | 0                                              |
| -0.23 [-0.34; -0.12] | $I^2 = 0\%$ , $\tau^2 = 0$ , $p = 0.89$       | Nenonen2005; Tsujimoto2011(a,b)                                                   | Fixed                | SCTX                | 3                                              |
| -0.34 [-0.48; -0.19] | $I^2 = 46\%$ , $\tau^2 = 0.0120$ , $p = 0.17$ | Eastell2011(a,b)                                                                  | Fixed                | SCTX                | 6                                              |
| 0.37 [0.30; 0.44]    | $I^2 = 0\%$ , $\tau^2 = 0$ , $p = 0.97$       | Chen2005e; Greenspan1998(a,b,c,d); Kim2005(b,c,d)                                 | Fixed                | UNTX                | 0                                              |
| -0.32 [-0.39; -0.24] | $I^2 = 28\%$ , $\tau^2 = 0.0022$ , $p = 0.25$ | Iwamoto2005a; Kim2005b; Iikuni2012                                                | Random               | UNTX                | 3                                              |
| -0.36 [-0.42; -0.28] | $I^2 = 0\%$ , $\tau^2 = 0$ , $p = 0.98$       | Kim2005a; Greenspan2005(a,b,c); Iwamoto2005b; Greenspan1998(d,e,f); Ravn2003d     | Random               | UNTX                | 6                                              |
| -0.43 [-0.61; -0.21] | $I^2 = 57\%$ , $\tau^2 = 0.0180$ , $p = 0.13$ | Iwamoto2005c; Ravn2003c                                                           | Random               | UNTX                | 12                                             |

ALP alkaline phosphatase, CI confidence interval, OC osteocalcin, PICP procollagen type I C propeptide, PINP procollagen type I N propeptide, S-CTX serum C-terminal crosslinking telopeptide of type I collagen, U-NTX urine N-terminal crosslinking telopeptide of type I collagen

**Table S5** Summary correlations of subgroup analyses by group of the time duration of BMD measurements

| <b>COR (95%CI)</b>   | <b>Heterogeneity</b>                    | <b>Included studies</b>                             | <b>Effects model</b> | <b>BTM</b> | <b>Time point of the BMD measurements (month)</b> |
|----------------------|-----------------------------------------|-----------------------------------------------------|----------------------|------------|---------------------------------------------------|
| -0.27 [-0.34; -0.20] | $I^2 = 0\%, \tau^2 = 0, p = 0.59$       | Majima2008; Tsujimoto2011(a,b); Watts2001(a,b)      | Fixed                | Bone ALP   | 12                                                |
| -0.20 [-0.34; -0.06] | Not applicable                          | Watts2001b                                          | Fixed                | Bone ALP   | 24                                                |
| -0.27 [-0.33; -0.21] | $I^2 = 0\%, \tau^2 = 0, p = 0.85$       | Eastell2011; Greenspan2005(a,b,d,e,h); Watts(a,b,c) | Fixed                | Bone ALP   | 36                                                |
| -0.30 [-0.48; -0.10] | Not applicable                          | Kim2005                                             | Fixed                | OC         | 12                                                |
| -0.32 [-0.47; -0.14] | $I^2 = 0\%, \tau^2 = 0, p = 0.95$       | Green1998(a,b)                                      | Fixed                | OC         | 30                                                |
| -0.39 [-0.48; -0.28] | $I^2 = 0\%, \tau^2 = 0, p = 0.73$       | Ravn2003(a,c,d,e,f)                                 | Fixed                | OC         | 48                                                |
| -0.23 [-0.34; -0.12] | $I^2 = 0\%, \tau^2 = 0, p = 0.89$       | Nenonen2005; Tsujimoto2011(a,b)                     | Fixed                | S-CTX      | 12                                                |
| -0.34 [-0.48; -0.19] | $I^2 = 46\%, \tau^2 = 0.0120, p = 0.17$ | Eastell2011(a,b)                                    | Fixed                | S-CTX      | 36                                                |
| -0.34 [-0.37; -0.31] | $I^2 = 0\%, \tau^2 = 0, p = 0.72$       | Kim2005(a,b); Iwamoto2005(a,b,c); Iikuni2012        | Fixed                | U-NTX      | 12                                                |
| -0.33 [-0.44; -0.21] | $I^2 = 0\%, \tau^2 = 0, p = 0.96$       | Greenspan1998(c,d,e,f)                              | Fixed                | U-NTX      | 30                                                |
| -0.34 [-0.46; -0.21] | $I^2 = 0\%, \tau^2 = 0, p = 0.99$       | Greenspan2005(a,b)                                  | Fixed                | U-NTX      | 36                                                |
| -0.52 [-0.64; -0.37] | $I^2 = 0\%, \tau^2 = 0, p = 0.82$       | Ravn2003(c,d)                                       | Fixed                | U-NTX      | 48                                                |

ALP alkaline phosphatase, CI confidence interval, OC osteocalcin, S-CTX serum C-terminal crosslinking telopeptide of type I collagen, U-NTX urine N-terminal crosslinking telopeptide of type I collagen



## References

1. Greenspan, S.; Parker, R.; Ferguson, L.; Rosen, H.; Maitland-Ramsey, L.; Karpf, D. Early changes in biochemical markers of bone turnover predict the long-term response to alendronate therapy in representative elderly women: a randomized clinical trial. In *Journal of bone and mineral research*, 1998; Vol. 13, pp 1431-1438.
2. Garnero, P.; Darte, C.; Delmas, P. A model to monitor the efficacy of alendronate treatment in women with osteoporosis using a biochemical marker of bone turnover. In *Bone*, 1999; Vol. 24, pp 603-609.
3. Watts, N.; Jenkins, D.; Visor, J.; Casal, D.; Geusens, P. Comparison of bone and total alkaline phosphatase and bone mineral density in postmenopausal osteoporotic women treated with alendronate. In *Osteoporosis international*, 2001; Vol. 12, pp 279-288.
4. Drake, W.M.; Kendler, D.L.; Rosen, C.J.; Orwoll, E.S. An investigation of the predictors of bone mineral density and response to therapy with alendronate in osteoporotic men. *The Journal of clinical endocrinology and metabolism* **2003**, 88, 5759-5765, doi:10.1210/jc.2002-021654.
5. Eastell, R.; Barton, I.; Hannon, R.; Chines, A.; Garnero, P.; Delmas, P. Relationship of early changes in bone resorption to the reduction in fracture risk with risedronate. In *Journal of bone and mineral research*, 2003; Vol. 18, pp 1051-1056.
6. Ravn, P.; Thompson, D.E.; Ross, P.D.; Christiansen, C. Biochemical markers for prediction of 4-year response in bone mass during bisphosphonate treatment for prevention of postmenopausal osteoporosis. *Bone* **2003**, 33, 150-158.
7. Greenspan, S.; Resnick, N.; Parker, R. Early changes in biochemical markers of bone turnover are associated with long-term changes in bone mineral density in elderly women on alendronate, hormone replacement therapy, or combination therapy: a three-year, double-blind, placebo-controlled, randomized clinical trial. In *Journal of clinical endocrinology and metabolism*, 2005; Vol. 90, pp 2762-2767.
8. Nenonen, A.; Cheng, S.; Ivaska, K.K.; Alatalo, S.L.; Lehtimäki, T.; Schmidt-Gayk, H.; Uusi-Rasi, K.; Heinonen, A.; Kannus, P.; Sievänen, H., et al. Serum TRACP 5b is a useful marker for monitoring alendronate treatment: Comparison with other markers of bone turnover. *Journal of Bone and Mineral Research* **2005**, 20, 1804-1812, doi:10.1359/JBMR.050403.
9. Iwamoto, J.; Takeda, T.; Sato, Y.; Uzawa, M. Early changes in urinary cross-linked N-terminal telopeptides of type I collagen level correlate with 1-year response of lumbar bone mineral density to alendronate in postmenopausal Japanese women with osteoporosis. *Journal of bone and mineral metabolism* **2005**, 23, 238-242, doi:10.1007/s00774-004-0590-3.
10. Takada, J.; Iba, K.; Yoshizaki, T.; Yamashita, T. Correlation between a bone resorption marker and structural geometry of the proximal femur in osteoporotic women treated with raloxifene. *Journal of orthopaedic surgery (Hong Kong)* **2012**, 20, 209-213, doi:10.1177/230949901202000215.
11. Iikuni, N.; Hamaya, E.; Nihojima, S.; Yokoyama, S.; Goto, W.; Taketsuna, M.; Miyauchi, A.; Sowa, H. Safety and effectiveness profile of raloxifene in long-term, prospective, postmarketing surveillance. *Journal of bone and mineral metabolism* **2012**, 30, 674-682, doi:10.1007/s00774-012-0365-1.
12. Majima, T.; Shimatsu, A.; Satoh, N.; Komatsu, Y.; Fukao, A.; Ninomiya, K.; Matsumura, T.; Nakao, K. Three-month changes in bone turnover markers and bone mineral density response to raloxifene in Japanese postmenopausal women with osteoporosis. *Journal of bone and mineral metabolism* **2008**, 26, 178-184, doi:10.1007/s00774-007-0807-3.
13. Lu, C.; Chen, Y.; Zhang, B.; Chen, Y.; Bai, F.; Chen, D. Response to teriparatide in Chinese patients with established osteoporosis: osteocalcin and lumbar spine bone-mineral density changes from teriparatide Phase III study. *Clinical interventions in aging* **2017**, 12, 1717-1723, doi:10.2147/cia.S140900.
14. Eastell, R.; Christiansen, C.; Grauer, A.; Kutilek, S.; Libanati, C.; McClung, M.; Reid, I.; Resch, H.; Siris, E.; Uebelhart, D., et al. Effects of denosumab on bone turnover markers in postmenopausal osteoporosis. In *Journal of bone and mineral research*, 2011; Vol. 26, pp 530-537.
15. Chen, P.; Satterwhite, J.; Licata, A.; Lewiecki, E.; Sipos, A.; Misurski, D.; Wagman, R. Early changes in biochemical markers of bone formation predict BMD response to teriparatide in postmenopausal women with osteoporosis. In *Journal of bone and mineral research*, 2005; Vol. 20, pp 962-970.
16. Tsujimoto, M.; Chen, P.; Miyauchi, A.; Sowa, H.; Krege, J. PINP as an aid for monitoring patients treated with teriparatide. In *Bone*, 2011; Vol. 48, pp 798-803.
17. Delmas, P.D.; Hardy, P.; Garnero, P.; Dain, M. Monitoring individual response to hormone replacement therapy with bone markers. *Bone* **2000**, 26, 553-560.
18. Riis, B.; Overgaard, K.; Christiansen, C. Biochemical markers of bone turnover to monitor the bone

- response to postmenopausal hormone replacement therapy. In *Osteoporosis international*, 1995; Vol. 5, pp 276-280.
19. Okabe, R.; Inaba, M.; Nakatsuka, K.; Miki, T.; Naka, H.; Moriguchi, A.; Nishizawa, Y. Significance of serum CrossLaps as a predictor of changes in bone mineral density during estrogen replacement therapy; comparison with serum carboxyterminal telopeptide of type I collagen and urinary deoxypyridinoline. *Journal of bone and mineral metabolism* **2004**, 22, 127-131, doi:10.1007/s00774-003-0460-4.
  20. Zhan, Z.W.; Yamamoto, I.; Morita, R.; Miura, H. Urinary pyridinoline and deoxypyridinoline as bone metabolic markers in predicting therapeutic effects of estrogen and alfacalcidol in women with osteoporosis. *Journal of Bone and Mineral Metabolism* **1999**, 17, 113-118, doi:10.1007/s007740050073.
  21. Chen, J.T.; Hosoda, K.; Hasumi, K.; Ogata, E.; Shiraki, M. Serum N-terminal osteocalcin is a good indicator for estimating responders to hormone replacement therapy in postmenopausal women. *Journal of bone and mineral research : the official journal of the American Society for Bone and Mineral Research* **1996**, 11, 1784-1792, doi:10.1002/jbmr.5650111123.
  22. Kim, S.W.; Park, D.J.; Park, K.S.; Kim, S.Y.; Cho, B.Y.; Lee, H.K.; Shin, C.S. Early changes in biochemical markers of bone turnover predict bone mineral density response to antiresorptive therapy in Korean postmenopausal women with osteoporosis. *Endocrine journal* **2005**, 52, 667-674.
